# Supplementary material for: Very early invasive angiography versus standard of care in higher-risk non-ST elevation myocardial infarction: study protocol for the prospective multicentre randomised controlled RAPID N-STEMI trial
Source: PubMed Central journal article supplement (PMC9066091; doi:10.1136/bmjopen-2021-055878), 2022-05-03
Supplement: bmjopen-2021-055878.draft_revisions.pdf [file bmjopen-2021-055878.draft_revisions.pdf]

# BMJ Open

BMJ Open is committed to open peer review. As part of this commitment we make the peer review history of every article we publish publicly available.

When an article is published we post the peer reviewers' comments and the authors' responses online. We also post the versions of the paper that were used during peer review. These are the versions that the peer review comments apply to.

The versions of the paper that follow are the versions that were submitted during the peer review process. They are not the versions of record or the final published versions. They should not be cited or distributed as the published version of this manuscript.

BMJ Open is an open access journal and the full, final, typeset and author-corrected version of record of the manuscript is available on our site with no access controls, subscription charges or pay-per-view fees (<http://bmjopen.bmj.com>).

If you have any questions on BMJ Open's open peer review process please email [info.bmjopen@bmj.com](mailto:info.bmjopen@bmj.com)

# BMJ Open

## A prospective multicentre randomised-controlled trial testing very early invasive angiography versus standard of care in higher-risk non-ST elevation myocardial infarction: rationale and design of the RAPID N-STEMI study

|                               |                                                                                                                                                                                                                                                                                                                                                                                                                                                                                                                                                                                                                                                                                                                                                                                                                                                                                                                                                                                                                                                                                                                                                                                                          |
|-------------------------------|----------------------------------------------------------------------------------------------------------------------------------------------------------------------------------------------------------------------------------------------------------------------------------------------------------------------------------------------------------------------------------------------------------------------------------------------------------------------------------------------------------------------------------------------------------------------------------------------------------------------------------------------------------------------------------------------------------------------------------------------------------------------------------------------------------------------------------------------------------------------------------------------------------------------------------------------------------------------------------------------------------------------------------------------------------------------------------------------------------------------------------------------------------------------------------------------------------|
| Journal:                      | <i>BMJ Open</i>                                                                                                                                                                                                                                                                                                                                                                                                                                                                                                                                                                                                                                                                                                                                                                                                                                                                                                                                                                                                                                                                                                                                                                                          |
| Manuscript ID                 | bmjopen-2021-055878                                                                                                                                                                                                                                                                                                                                                                                                                                                                                                                                                                                                                                                                                                                                                                                                                                                                                                                                                                                                                                                                                                                                                                                      |
| Article Type:                 | Protocol                                                                                                                                                                                                                                                                                                                                                                                                                                                                                                                                                                                                                                                                                                                                                                                                                                                                                                                                                                                                                                                                                                                                                                                                 |
| Date Submitted by the Author: | 26-Jul-2021                                                                                                                                                                                                                                                                                                                                                                                                                                                                                                                                                                                                                                                                                                                                                                                                                                                                                                                                                                                                                                                                                                                                                                                              |
| Complete List of Authors:     | Kite, Thomas; Glenfield Hospital, Department of Cardiovascular Sciences<br>Banning, Amerjeet S.; Glenfield Hospital, Department of Cardiovascular Sciences<br>Ladwiniec, Andrew<br>Gale, Chris; University of Leeds<br>Greenwood, John; Leeds Teaching Hospitals NHS Trust, Cardiology; University of Leeds, Biomedical Imaging Sciences<br>Dalby, Miles; Royal Brompton & Harefield NHS Foundation Trust, Imperial College London; Royal Brompton & Harefield NHS Foundation Trust<br>Hobson, Rachel; University of Leicester<br>Barber, Shaun; University of Leicester<br>Parker, Emma; Glenfield Hospital, Department of Cardiovascular Sciences<br>Berry, Colin; University of Glasgow, British Heart Foundation Glasgow Cardiovascular Research Centre; University of Glasgow<br>Flather, Marcus; University of East Anglia, Norwich Medical School<br>Curzen, Nick; University Hospital Southampton NHS F Trust, Wessex Cardiac Unit<br>Banning, AP; Oxford University Hospitals NHS Foundation Trust, Cardiology Department, Oxford Heart Centre<br>McCann, Gerry; Glenfield Hospital, Department of Cardiovascular Sciences<br>GERSHLICK, ANTHONY; University Hospitals of Leicester, Cardiology |
| Keywords:                     | Ischaemic heart disease < CARDIOLOGY, Myocardial infarction < CARDIOLOGY, Coronary intervention < CARDIOLOGY, Coronary heart disease < CARDIOLOGY                                                                                                                                                                                                                                                                                                                                                                                                                                                                                                                                                                                                                                                                                                                                                                                                                                                                                                                                                                                                                                                        |
|                               |                                                                                                                                                                                                                                                                                                                                                                                                                                                                                                                                                                                                                                                                                                                                                                                                                                                                                                                                                                                                                                                                                                                                                                                                          |

SCHOLARONE™  
Manuscripts

1  
2  
3  
4  
5  
6  
7  
8  
9  
10  
11  
12  
13  
14  
15  
16  
17  
18  
19  
20  
21  
22  
23  
24  
25  
26  
27  
28  
29  
30  
31  
32  
33  
34  
35  
36  
37  
38  
39  
40  
41  
42  
43  
44  
45  
46  
47  
48  
49  
50  
51  
52  
53  
54  
55  
56  
57  
58  
59  
60

**A prospective multicentre randomised-controlled trial testing very early invasive angiography versus standard of care in higher-risk non-ST elevation myocardial infarction: rationale and design of the RAPID N-STEMI study**

Thomas A. Kite BMedSci (Hons) BM BS MRCP<sup>1</sup>, Amerjeet S. Banning MBBS PhD MRCP<sup>1</sup>, Andrew Ladwiniec MA MD FRCP<sup>1</sup>, Chris P. Gale BSc PhD FRCP<sup>2</sup>, John P. Greenwood MBChB PhD FRCP<sup>2</sup>, Miles Dalby BSc MBBS MD<sup>3</sup>, Rachel Hobson BA(Hons)<sup>4</sup>, Shaun Barber BSc MSc PhD<sup>4</sup>, Emma Parker<sup>1</sup>, Colin Berry MBChB PhD<sup>5</sup>, Marcus Flather MBBS MBA FRCP<sup>6</sup>, Nick Curzen BM (Hons) PhD<sup>7</sup>, Adrian P. Banning MB BS, MD, FRCP<sup>8</sup>, Gerry P. McCann<sup>1</sup>, Anthony H. Gershlick BSc MB BS FRCP<sup>1</sup>

**Affiliations:**

1. Department of Cardiovascular Sciences, University of Leicester and the Leicester Biomedical Research Centre, Glenfield Hospital, Leicester, UK
2. Leeds Institute of Cardiovascular and Metabolic Medicine, University of Leeds and the Department of Cardiology Leeds Teaching Hospitals NHS Trust, Leeds, UK
3. Royal Brompton and Harefield NHS Foundation Trust, London, UK
4. Leicester Clinical Trials Unit, University of Leicester, University Road, Leicester, UK
5. Institute of Cardiovascular and Medical Sciences, University of Glasgow, Glasgow, UK
6. Norwich Medical School, University of East Anglia, Norwich, UK
7. Faculty of Medicine, University of Southampton and University Hospital Southampton NHS Trust Southampton, UK
8. John Radcliffe Hospital, Oxford University Hospitals NHS Trust, Oxford, UK

**Corresponding author:**

Dr Thomas A. Kite

Department of Cardiovascular Sciences, University of Leicester and the Leicester Biomedical Research Centre, Glenfield Hospital, Leicester, LE3 9QP, UK

Email: [tom.kite@nhs.net](mailto:tom.kite@nhs.net)

## Abstract

**Introduction:** There are a paucity of randomised data on the optimal timing of invasive coronary angiography (ICA) in higher-risk patients with non-ST elevation myocardial infarction (N-STEMI). International guideline recommendations for early ICA are primarily based on retrospective subgroup analyses of neutral trials. The RAPID N-STEMI trial aims to determine whether very early percutaneous revascularisation improves clinical outcomes as compared to a standard of care strategy in higher-risk N-STEMI patients.

**Methods and analysis:** RAPID N-STEMI is a prospective, multi-centre, open-label, randomised-controlled, pragmatic strategy trial. Higher-risk N-STEMI patients, as defined by Global Registry of Acute Coronary Events (GRACE) 2.0 score  $\geq 118$ , or  $>90$  with at least one additional high-risk feature, were randomised to either: very early ICA +/- revascularisation or standard of care timing of ICA +/- revascularisation. The primary endpoint is a composite of all-cause mortality, non-fatal myocardial infarction, and hospital admission for heart failure at 12 months. Key secondary outcomes include major bleeding and stroke. A hypothesis generating cardiac magnetic resonance (CMR) substudy will provide mechanistic data on infarct size, myocardial salvage, and residual ischaemia post percutaneous coronary intervention. On 7<sup>th</sup> April 2021, the sponsor discontinued enrolment due to the impact of the COVID-19 pandemic and lower than expected event rates. 425 patients were enrolled, and 61 patients underwent CMR.

**Summary:** The optimal timing of revascularisation in higher-risk N-STEMI remains controversial. RAPID N-STEMI will provide insights into the impact of very early revascularisation in GRACE score defined high-risk N-STEMI patients and inform contemporary practice in this important patient cohort.

**Ethics and dissemination:** The study has full ethical approval. Data collection will be completed in December 2021. The study results will be submitted for publication within 6 months of completion

### Trial registration number

NCT03707314

1  
2  
3 **Clinical trial registration**

4 NCT03707314  
5

6  
7 **Protocol version**

8 v4.0  
9

10 **Keywords**

11 Non-ST elevation myocardial infarction; percutaneous coronary intervention; timing; invasive  
12 strategy; GRACE score  
13  
14

15 **Word count**

16 2807  
17  
18  
19  
20  
21  
22  
23  
24  
25  
26  
27  
28  
29  
30  
31  
32  
33  
34  
35  
36  
37  
38  
39  
40  
41  
42  
43  
44  
45  
46  
47  
48  
49  
50  
51  
52  
53  
54  
55  
56  
57  
58  
59  
60

### Strength and limitations of this study

- Prior data from subgroup analyses suggest that an early invasive strategy may improve clinical outcomes in high-risk patients with N-STEMI.
- RAPID N-STEMI is the first randomised-controlled trial to specifically investigate the impact of very early angiography and revascularisation in a high-risk N-STEMI population as defined by GRACE score.
- The RAPID N-STEMI cardiac magnetic resonance substudy will provide mechanistic insights into the effect of timing of revascularisation on myocardial injury and other novel cardiac magnetic resonance imaging markers.
- Recruitment to the study was discontinued prematurely due to the impact of the COVID-19 pandemic and lower than expected event rates.

## Introduction

Historical data indicate that an invasive strategy during index hospital admission in non-ST elevation myocardial infarction (N-STEMI) improves composite ischaemic outcomes, with maximal benefit seen in those at highest baseline risk for future major adverse cardiovascular events (MACE).<sup>1</sup> However, the optimal timing of invasive coronary angiography (ICA) and whether high-risk subgroups should be treated early remains controversial, despite it being a mandated management strategy in international guidelines.<sup>2,3</sup> Since N-STEMI is characterised by a risk-treatment paradox whereby higher-risk patients are less likely to receive aggressive pharmacotherapy and invasive management,<sup>4</sup> use and timing of ICA can differ significantly when compared to the precisely defined management of ST elevation myocardial infarction (STEMI). Clinically unstable patients require urgent revascularisation, whilst for others, the most appropriate timing of an invasive strategy is less certain.

A series of randomised trials have investigated this concept in unselected N-STEMI populations, thereby testing whether early revascularisation (<24 hours) improves clinical outcomes as compared to delayed or standard of care approaches.<sup>5-18</sup> Differences in study design, inclusion criteria, timing of ICA and endpoint definitions have resulted in conflicting results that are challenging to interpret and apply to current practice. When these data are evaluated in totality, patient level meta-analysis has demonstrated no significant difference in death or myocardial infarction (MI) between the two strategies.<sup>19</sup>

The application of the Global Registry of Acute Coronary Events (GRACE) score in prior trial subgroup analyses has potential for risk stratification of those patients that may benefit most from expeditious revascularisation (**Table 1**). A GRACE score >140 analysis of 961 patients

1  
2  
3 from the TIMACS trial showed that an early invasive strategy (14 hours post randomisation)  
4 reduced the risk of death, non-fatal MI, and stroke at 6 months by 35% as compared to a  
5 delayed approach.<sup>9</sup> Moreover, the VERDICT study produced a similar finding, albeit in a  
6 subgroup of 1025 GRACE >140 N-STEMI patients who underwent a very early invasive strategy  
7 (4.7 hours post randomisation).<sup>15</sup> However, such analyses should only be considered  
8 hypothesis generating since; 1) the primary outcome in both overall trial populations was  
9 neutral, and 2) the studies were undertaken in the era of conventional troponin and CK-MB,  
10 with up to one-quarter of patients exhibiting no biomarker rise.<sup>9</sup>  
11  
12  
13  
14  
15  
16  
17  
18  
19  
20  
21  
22  
23  
24

25 Given that currently available data are inconsistent and of insufficient scientific quality to  
26 inform best practice, a contemporary trial that prospectively investigates the timing of  
27 revascularisation in GRACE score defined high-risk N-STEMI is required to confirm or refute  
28 these prior observations.  
29  
30  
31  
32  
33  
34  
35  
36

## 37 **Methods and analysis**

### 38 **Study design and inclusion criteria**

39  
40 The RAPID N-STEMI trial enrolled patients across 32 hospitals with on-site cardiac catheter  
41 laboratories in the United Kingdom (UK). Potential participants who experienced symptoms  
42 within 12 hours prior to admission were assessed on attendance to hospital and the research  
43 team alerted if a diagnosis of N-STEMI was suspected. N-STEMI was defined as: 1) the  
44 presence of cardiovascular symptoms suggestive of myocardial ischaemia and, 2) elevation in  
45 high-sensitivity troponin (hs-Tn) I or T. Risk stratification using the GRACE 2.0 score was then  
46 performed. Patients in whom the GRACE 2.0 score was  $\geq 118$ , or  $\geq 90$  with at least one  
47  
48  
49  
50  
51  
52  
53  
54  
55  
56  
57  
58  
59  
60



1  
2  
3 additional feature of high-risk presentation were deemed as higher risk. The full inclusion and  
4  
5 exclusion criteria are listed in **Table 2**.  
6  
7  
8  
9

10 Patients were enrolled after obtaining verbal consent once eligibility was confirmed in the  
11  
12 Emergency Department or appropriate receiving unit. Participants were then randomised in  
13  
14 a 1:1 fashion to either: Group A) very early ICA with a view to revascularisation; or Group B)  
15  
16 standard of care timing of ICA with a view to revascularisation. Research team members had  
17  
18 6 hours from hospital admission to randomise verbally consented patients who met all  
19  
20 eligibility criteria (**Figure 1**).  
21  
22  
23  
24  
25

### 26 27 **Study procedures**

28  
29 Randomisation was performed via either a secure centralised web-based or telephone  
30  
31 assisted system provided by <http://www.sealedenvelope.com>. Those assigned to very early  
32  
33 angiography were transferred to the cardiac catheter laboratory as soon as possible. Teams  
34  
35 were encouraged, but not mandated to achieve a randomisation to vascular sheath insertion  
36  
37 time of less than 90 minutes. Timing of standard of care ICA was according to typical practice  
38  
39 at individual UK centres but encouraged to be within 72 hours of admission. Percutaneous  
40  
41 coronary intervention (PCI) and coronary artery bypass grafting (CABG) were performed  
42  
43 according to current international guidelines.<sup>20</sup> Requirement for multi-vessel  
44  
45 revascularisation to a non-infarct related artery was at the individual operator's discretion.  
46  
47 Optimal medical therapy, including the use of anti-platelet agents, was in accordance with  
48  
49 current clinical guidelines.<sup>2</sup> Drug eluting stents were used in all cases unless there were clear  
50  
51 contraindications. As this was a pragmatic strategy trial, all procedures performed were part  
52  
53 of guideline directed standard of care for N-STEMI.  
54  
55  
56  
57  
58  
59  
60

1  
2  
3  
4  
5  
6 Patients were invited to provide verbal consent to participate in the study after being read an  
7  
8 abridged consent form prior to randomisation. This was to avoid delay in those participants  
9  
10 that were subsequently allocated to a very early invasive strategy. In addition to the baseline  
11  
12 hs-Tn required for study inclusion, samples were obtained post-angiography in both trial arms  
13  
14 and prior to angiography in the standard of care arm. EQ-5D-5L and Seattle Angina  
15  
16 Questionnaires to assess quality of life were completed after angiography in both arms.<sup>21 22</sup>  
17  
18 All patients were then asked to provide written informed consent for continuation in the  
19  
20 study prior to hospital discharge. Study follow up visits via telephone occurred at 30 days, 6  
21  
22 months, and 12 months from randomisation. Clinical event reporting, EQ-5D-5L and Seattle  
23  
24 Angina Questionnaire completion were performed at each of these timepoints.  
25  
26  
27  
28  
29  
30  
31  
32

### 33 **The GRACE 2.0 score**

34  
35 Previous high-risk subgroup analyses utilised the original GRACE score, with a score of >140  
36  
37 stratifying those patients at highest baseline risk. In the TIMACS and VERDICT trials it was  
38  
39 these groups that benefited from an early invasive strategy.<sup>9 15</sup> However, the updated GRACE  
40  
41 2.0 score demonstrates equivalent performance and is easier to implement in clinical practice  
42  
43 as compared to the original GRACE Score.<sup>23</sup> A notable advantage of GRACE 2.0 is that Killip  
44  
45 Class and serum creatinine values are not required for risk calculation. This allows rapid  
46  
47 stratification very early during hospital admission once a hs-Tn result is available, thus  
48  
49 obviating the need to wait for renal biochemistry results.  
50  
51  
52  
53  
54  
55

56  
57 Patients at intermediate risk (GRACE 2.0 score  $\geq 90$  to  $< 118$ ) were included to attenuate the  
58  
59 perceived age bias of the GRACE score, thereby allowing enrolment of younger patients  
60

1  
2  
3 recognised to be at higher risk of future MACE. The following features: anterior ECG changes,  
4  
5 ST segment depression, diabetes mellitus on medication, and hs-Tn elevation three times the  
6  
7 upper limit of normal, have been demonstrated as determinants of poorer prognosis in N-  
8  
9 STEMI.<sup>24-26</sup>  
10  
11  
12  
13  
14

### 15 **Study endpoints**

16  
17 The RAPID-NSTEMI trial will evaluate the effect of a very early invasive strategy on the  
18  
19 composite primary endpoint of all-cause mortality, non-fatal MI, and admission for heart  
20  
21 failure (HF) at 12 months following randomisation. The primary and secondary endpoints are  
22  
23 listed in **Table 3**.  
24  
25  
26  
27  
28  
29

### 30 **Sample size calculation and statistical analysis**

31  
32 RAPID N-STEMI is a superiority trial powered to detect a 25% risk reduction in the primary  
33  
34 endpoint. With a two-sided test of  $\alpha=0.05$  and 80% power, 964 patients were required in  
35  
36 each arm of the study. Assuming up to 5% withdrawal, 5% crossover and 8% requiring  
37  
38 coronary artery bypass grafting, 1157 patients were planned to be recruited to each group,  
39  
40 resulting in a recruitment target of 2314.  
41  
42  
43  
44  
45  
46

47 Sample size calculations were based primarily on the subgroup analysis of GRACE >140 high-  
48  
49 risk patients in the TIMACS study. The composite endpoint of death, non-fatal MI, and stroke  
50  
51 at 6 months occurred in 21.0% of patients in the standard care arm.<sup>9</sup> We decided to include  
52  
53 admission with HF since there is evidence of this being an important outcome following N-  
54  
55 STEMI hospitalisation. Data from *Kaul et al* show that at 12 months following N-STEMI the  
56  
57 incidence of admission with HF was 14.8%.<sup>27</sup> Based on these data and use of the GRACE 2.0  
58  
59  
60

1  
2  
3 score, the standard care arm composite event rate of all-cause mortality, non-fatal MI, and  
4  
5 admission for HF in RAPID N-STEMI was estimated to be 19% at 12 months.  
6  
7  
8  
9

10 The CMR substudy is an exploratory mechanistic substudy that had a recruitment target of  
11  
12 200 patients. No formal power calculations were undertaken.  
13  
14  
15  
16  
17

### 18 **RAPID N-STEMI CMR substudy**

19

20 Imaging studies confined to N-STEMI are few and primarily descriptive, documenting smaller  
21  
22 infarct size than in STEMI.<sup>28</sup> Novel cardiac magnetic resonance (CMR) markers (such as  
23  
24 myocardial strain and salvage) may add incremental prognostic information to recognised  
25  
26 predictors such as left ventricular ejection fraction (LVEF).<sup>29 30</sup>  
27  
28  
29  
30  
31

32 The RAPID N-STEMI CMR substudy applied multi-parametric CMR imaging to; 1) assess the  
33  
34 impact of the timing of revascularisation on infarct size, volumes and LVEF, myocardial strain,  
35  
36 myocardial salvage, and extracellular volume and 2) quantify ischaemic burden post-PCI to  
37  
38 ascertain whether this can predict risk of future MACE. The RAPID N-STEMI CMR substudy  
39  
40 endpoints are listed in **Table 4**.  
41  
42  
43  
44  
45  
46

47 Four centres with an established record of high-quality CMR research participated in the  
48  
49 substudy. As myocardial injury and infarct size reduces early following MI,<sup>31</sup> timing of CMR  
50  
51 was standardised and performed at 7 (+/-3) days post admission. This also ensured  
52  
53 angiography +/- PCI had been undertaken in both groups, as PCI itself may be associated with  
54  
55 further myocardial injury.<sup>32 33</sup> The protocol included cine imaging in long and short axes.  
56  
57 Adenosine stress perfusion was performed to assess for residual ischaemic burden and a  
58  
59  
60

1  
2  
3 gadolinium-based contrast agent administered to allow detection of myocardial necrosis and  
4  
5 microvascular obstruction.<sup>33</sup> Where available, pre- and post-contrast T1 mapping sequences  
6  
7 will facilitate estimation of extracellular volume that may indicate more subtle changes in  
8  
9 myocardial architecture.<sup>34</sup>  
10  
11  
12  
13  
14

15 All CMR images will be sent to the core laboratory at the National Institute for Health  
16  
17 Research Biomedical Research Centre in Leicester for quality control and central analysis, with  
18  
19 the interpreting clinicians blinded to patient information and allocated group.  
20  
21  
22  
23  
24

### 25 **Patient and public involvement (PPI)**

26  
27 The University of Leicester and the Leicester NIHR Biomedical Research Centre have a very  
28  
29 active PPI group in cardiovascular sciences. The study outline was presented to our PPI groups  
30  
31 for feedback prior to designing the study protocol. Furthermore, the Trial Steering Committee  
32  
33 has a lay member for study oversight. All study participants and members of the public will  
34  
35 be invited to return for a lecture disseminating the study's key findings on completion.  
36  
37  
38  
39  
40  
41

### 42 **Trial coordination**

43  
44 Trial coordination is provided by the Leicester Clinical Trials Unit (LCTU) in collaboration with  
45  
46 the Chief Investigator (CI) and the Trial Management Group. LCTU is responsible for overall  
47  
48 trial conduct including data management, quality assurance and statistical reporting. LCTU  
49  
50 undertook site initiation visits, database training, and ensures all aspects of the trial are  
51  
52 performed to the highest ethical and research standards. The study is overseen by a Trial  
53  
54 Steering Committee consisting of three experienced clinicians, the CI, and a lay member. An  
55  
56 independent Data and Safety Monitoring Board convened to provide independent advice on  
57  
58  
59  
60

1  
2  
3 study conduct and safety issues. Clinical events will be adjudicated by an independent Clinical  
4  
5 Events Committee.  
6  
7  
8  
9

### 10 **Funding and sponsor**

11  
12 RAPID N-STEMI is funded by the British Heart Foundation (grant number: CS/17/1/32445).  
13  
14 The study sponsor is University Hospitals of Leicester National Health Service (NHS) Trust. The  
15  
16 study is registered at ClinicalTrials.gov (NCT03707314). All procedures have been reviewed  
17  
18 and approved by the UK National Research Ethics Service committee East of England  
19  
20 (18/EE/0222).  
21  
22  
23  
24  
25  
26  
27

### 28 **Trial progress and impact of the COVID-19 pandemic**

29  
30 In March 2020, non-COVID-19 clinical research in the UK was suspended as NHS staff and  
31  
32 resources were repurposed to frontline services in preparation for the volume of COVID-19  
33  
34 patients expected to place severe pressure on the NHS.<sup>35</sup> During this time, admissions with  
35  
36 N-STEMI declined substantially.<sup>36 37</sup> Following the first wave in the UK, RAPID N-STEMI  
37  
38 restarted in late July 2020 at a limited number of sites that had sufficient resource to  
39  
40 recommence recruitment. However, due to the impending second wave of the COVID-19  
41  
42 pandemic the trial was once again suspended in December 2020. Discussions with the  
43  
44 funding body took place regarding the strategy for a successful restart, with it agreed an  
45  
46 interim pooled event rate (blinded to group allocation) should be calculated. Lower than  
47  
48 anticipated event rates were documented and it was agreed with the funder that enrolment  
49  
50 should be discontinued for two reasons: 1) the effect of the pandemic on clinical services and  
51  
52 2) the rate of the primary outcome. In summary, 425 (18.4% intended) patients were enrolled  
53  
54 to the main trial, with 61 of these participants included in the CMR substudy. The intention is  
55  
56  
57  
58  
59  
60

1  
2  
3 to perform in depth analyses of the available data from these populations and present these  
4  
5 in the near future.  
6  
7  
8  
9

## 10 **Discussion**

11  
12 The optimal timing of revascularisation in higher-risk N-STEMI is a controversial topic, not  
13  
14 least because international guidelines that mandate an early (<24 hr) invasive strategy are  
15  
16 not supported by prospective randomised-controlled clinical trial data that specifically  
17  
18 investigate this population.<sup>2 3</sup> RAPID N-STEMI addresses this knowledge gap. However, like  
19  
20 many other clinical trials during the COVID-19 pandemic, RAPID N-STEMI was discontinued  
21  
22 due to the emergency restructuring of healthcare and clinical research services. Despite  
23  
24 falling short of the recruitment target, RAPID N-STEMI has randomised 425 GRACE score  
25  
26 defined higher-risk patients admitted with N-STEMI, making it the third largest study to  
27  
28 specifically investigate this important patient population. It will therefore provide a significant  
29  
30 contribution to the current evidence base, with dissemination of results planned for 2022.  
31  
32  
33  
34  
35  
36  
37  
38  
39

## 40 **COVID-19: implications for cardiovascular research**

41  
42 The major challenges faced due to COVID-19 were three-fold. First, significant reductions in  
43  
44 admissions with acute coronary syndrome and HF occurred during the pandemic in the UK,  
45  
46 with decreases of over to 40% in both disease entities, presumably due to fear of contagion  
47  
48 in healthcare settings.<sup>36 38 39</sup> Not only did this reduce potential research participants, but such  
49  
50 declines in admissions become a critical issue for clinical trial event reporting and thus may  
51  
52 be a contributory factor to the lower event rates observed in RAPID N-STEMI.  
53  
54  
55  
56  
57  
58  
59  
60

1  
2  
3 Second, the NHS underwent the largest workforce redeployment since its inception to  
4 support severely pressurised frontline services treat the vast numbers of COVID-19 patients  
5 attending UK hospitals. Research staff were moved to such clinical areas, resulting in all non-  
6 COVID-19 related research being left severely disrupted and placed on hiatus until further  
7 notice,<sup>40</sup> the ramifications of which are sure to be felt long after the initial effects of the  
8 COVID-19 pandemic have abated.<sup>41</sup>  
9  
10  
11  
12  
13  
14  
15  
16  
17  
18  
19

20 Third, and perhaps most fundamentally for RAPID N-STEMI, elective cardiology activity across  
21 the UK was effectively cancelled from the beginning of the first wave in March 2020.<sup>35</sup>  
22 Suspension of planned cases created greater catheter laboratory capacity for acute MI  
23 patients and dramatically reduced the standard of care timing to ICA for N-STEMI in the UK.<sup>42</sup>  
24 Such changes to catheter laboratory throughput and working patterns resulted in an  
25 unmanageable task of ensuring adequate time separation between the very early ICA and  
26 standard of care ICA arms in RAPID N-STEMI – essentially the control arm was accelerated.  
27 Since any potential differences in clinical outcomes are related to the difference in timing  
28 between the trial arms, new systems of care enforced by the COVID-19 pandemic left the  
29 RAPID N-STEMI investigators in a position whereby restarting recruitment would inevitably  
30 jeopardise the scientific validity of the trial.  
31  
32  
33  
34  
35  
36  
37  
38  
39  
40  
41  
42  
43  
44  
45  
46  
47  
48  
49

### 50 **Very early revascularisation in higher-risk N-STEMI: will optimal timing ever be defined?**

51 RAPID N-STEMI is the fifth randomised trial to investigate the timing of an invasive strategy in  
52 GRACE score defined higher-risk N-STEMI patients, albeit the first to specifically investigate  
53 this higher-risk population. Prior studies report pre-specified GRACE >140 subgroup analyses  
54 (Table 1). Favourable results were observed in TIMACS and VERDICT,<sup>9 15</sup> while ELISA-3 and  
55  
56  
57  
58  
59  
60



1  
2  
3 RIDDLE N-STEMI showed signals of benefit although were limited by small sample sizes.<sup>12 14</sup>  
4  
5  
6 Since clinical event rates are greater in high-risk N-STEMI, it may be expected that an  
7  
8 adequately powered study to detect a clinically meaningful difference is achievable. Yet, in  
9  
10 recent years outcomes following N-STEMI have improved, largely due to enhanced  
11  
12 therapeutics and interventional techniques.<sup>43</sup> Therefore, demonstration of superiority for  
13  
14 hard clinical endpoints from a very early invasive strategy may not be feasible in the  
15  
16 contemporary era because the logistics of delivering an appropriately powered trial may be  
17  
18 prohibitive.  
19  
20  
21  
22  
23  
24

25 The choice of trial endpoints is also of note. The EARLY trial indicated benefit from a very early  
26  
27 invasive approach in European Society of Cardiology defined high-risk patients (median  
28  
29 GRACE score 122), but such benefit was driven by the softer endpoint of recurrent ischaemic  
30  
31 events in a cohort that did not receive P2Y12 inhibitor pre-treatment.<sup>17</sup> One may question the  
32  
33 clinical relevance of an endpoint, and as such it was not included in the composite primary  
34  
35 endpoint of RAPID N-STEMI. Given that practice in many centres is now shifting to a strategy  
36  
37 of early ICA in higher-risk N-STEMI patient groups, and that this strategy is now widely  
38  
39 accepted as without excess risk, it appears unlikely that the optimal timing of  
40  
41 revascularisation in higher-risk N-STEMI will ever be robustly defined.  
42  
43  
44  
45  
46  
47  
48  
49

## 50 **Conclusion**

51  
52 RAPID N-STEMI and its mechanistic CMR substudy will provide further insights into GRACE  
53  
54 score defined higher-risk N-STEMI and provide an additional contribution to the evidence  
55  
56 base.  
57  
58  
59  
60

## References

1. Fox KAA, Clayton TC, Damman P, et al. Long-term outcome of a routine versus selective invasive strategy in patients with non-ST-segment elevation acute coronary syndrome: a meta-analysis of individual patient data. *J Am Coll Cardiol* 2010;55(22):2435-45. doi: 10.1016/j.jacc.2010.03.007
2. Collet JP, Thiele H, Barbato E, et al. 2020 ESC Guidelines for the management of acute coronary syndromes in patients presenting without persistent ST-segment elevation. *Eur Heart J* 2020 doi: 10.1093/eurheartj/ehaa575 [published Online First: 2020/08/30]
3. Amsterdam EA, Wenger NK, Brindis RG, et al. 2014 AHA/ACC Guideline for the Management of Patients with Non-ST-Elevation Acute Coronary Syndromes: a report of the American College of Cardiology/American Heart Association Task Force on Practice Guidelines. *J Am Coll Cardiol* 2014;64(24):e139-e228. doi: 10.1016/j.jacc.2014.09.017
4. Hall M, Bebb OJ, Dondo TB, et al. Guideline-indicated treatments and diagnostics, GRACE risk score, and survival for non-ST elevation myocardial infarction. *Eur Heart J* 2018;39(42):3798-806. doi: 10.1093/eurheartj/ehy517 [published Online First: 2018/09/12]
5. van 't Hof AW, de Vries ST, Dambrink JH, et al. A comparison of two invasive strategies in patients with non-ST elevation acute coronary syndromes: results of the Early or Late Intervention in unStable Angina (ELISA) pilot study. 2b/3a upstream therapy and acute coronary syndromes. *Eur Heart J* 2003;24(15):1401-5.
6. Neumann FJ, Kastrati A, Pogatsa-Murray G, et al. Evaluation of prolonged antithrombotic pretreatment ("cooling-off" strategy) before intervention in patients with unstable coronary syndromes: a randomized controlled trial. *JAMA* 2003;290(12):1593-9. doi: 10.1001/jama.290.12.1593
7. Montalescot G, Cayla G, Collet JP, et al. Immediate vs delayed intervention for acute coronary syndromes: a randomized clinical trial. *JAMA* 2009;302(9):947-54. doi: 10.1001/jama.2009.1267
8. Riezebos RK, Ronner E, Ter Bals E, et al. Immediate versus deferred coronary angioplasty in non-ST-segment elevation acute coronary syndromes. *Heart* 2009;95(10):807-12. doi: 10.1136/hrt.2008.154815
9. Mehta SR, Granger CB, Boden WE, et al. Early versus delayed invasive intervention in acute coronary syndromes. *N Engl J Med* 2009;360(21):2165-75. doi: 10.1056/NEJMoa0807986
10. Sciahbasi A, Madonna M, De Vita M, et al. Comparison of immediate vs early invasive strategy in patients with first acute non-ST-elevation myocardial infarction. *Clin Cardiol* 2010;33(10):650-5. doi: 10.1002/clc.20785 [published Online First: 2010/10/21]
11. Thiele H, Rach J, Klein N, et al. Optimal timing of invasive angiography in stable non-ST-elevation myocardial infarction: the Leipzig Immediate versus early and late Percutaneous coronary Intervention triAl in NSTEMI (LIPSIA-NSTEMI Trial). *Eur Heart J* 2012;33(16):2035-43. doi: 10.1093/eurheartj/ehr418
12. Badings EA, The SH, Dambrink JH, et al. Early or late intervention in high-risk non-ST-elevation acute coronary syndromes: results of the ELISA-3 trial. *EuroIntervention* 2013;9(1):54-61. doi: 10.4244/EIJV9I1A9

13. Reuter PG, Rouchy C, Cattan S, et al. Early invasive strategy in high-risk acute coronary syndrome without ST-segment elevation. The Sisca randomized trial. *Int J Cardiol* 2015;182:414-8. doi: 10.1016/j.ijcard.2014.12.089
14. Milosevic A, Vasiljevic-Pokrajcic Z, Milasinovic D, et al. Immediate Versus Delayed Invasive Intervention for Non-STEMI Patients: The RIDDLE-NSTEMI Study. *JACC Cardiovasc Interv* 2016;9(6):541-9. doi: 10.1016/j.jcin.2015.11.018
15. Kofoed KF, Kelbaek H, Hansen PR, et al. Early Versus Standard Care Invasive Examination and Treatment of Patients With Non-ST-Segment Elevation Acute Coronary Syndrome. *Circulation* 2018;138(24):2741-50. doi: 10.1161/CIRCULATIONAHA.118.037152
16. Rasmussen MB, Stengaard C, Sorensen JT, et al. Comparison of Acute Versus Subacute Coronary Angiography in Patients With NON-ST-Elevation Myocardial Infarction (from the NONSTEMI Trial). *Am J Cardiol* 2019;124(6):825-32. doi: 10.1016/j.amjcard.2019.06.007 [published Online First: 2019/07/22]
17. Lemesle G, Laine M, Pankert M, et al. Optimal Timing of Intervention in NSTEMI-ACS Without Pre-Treatment: The EARLY Randomized Trial. *JACC Cardiovasc Interv* 2020;13(8):907-17. doi: 10.1016/j.jcin.2020.01.231 [published Online First: 2020/04/25]
18. Fagel ND, Amoroso G, Vink MA, et al. An immediate or early invasive strategy in non-ST-elevation acute coronary syndrome: The OPTIMA-2 randomized controlled trial. *Am Heart J* 2021;234:42-50.
19. Jobs A, Mehta SR, Montalescot G, et al. Optimal timing of an invasive strategy in patients with non-ST-elevation acute coronary syndrome: a meta-analysis of randomised trials. *Lancet* 2017;390(10096):737-46. doi: 10.1016/S0140-6736(17)31490-3
20. Neumann FJ, Sousa-Uva M, Ahlsson A, et al. 2018 ESC/EACTS Guidelines on myocardial revascularization. *Eur Heart J* 2019;40(2):87-165. doi: 10.1093/eurheartj/ehy394 [published Online First: 2018/08/31]
21. Herdman M, Gudex C, Lloyd A, et al. Development and preliminary testing of the new five-level version of EQ-5D (EQ-5D-5L). *Qual Life Res* 2011;20(10):1727-36. doi: 10.1007/s11136-011-9903-x [published Online First: 2011/04/12]
22. Spertus JA, Winder JA, Dewhurst TA, et al. Development and evaluation of the Seattle Angina Questionnaire: a new functional status measure for coronary artery disease. *J Am Coll Cardiol* 1995;25(2):333-41. doi: 10.1016/0735-1097(94)00397-9 [published Online First: 1995/02/01]
23. Fox KA, Fitzgerald G, Puymirat E, et al. Should patients with acute coronary disease be stratified for management according to their risk? Derivation, external validation and outcomes using the updated GRACE risk score. *BMJ Open* 2014;4(2):e004425. doi: 10.1136/bmjopen-2013-004425
24. Stone PH, Raabe DS, Jaffe AS, et al. Prognostic significance of location and type of myocardial infarction: independent adverse outcome associated with anterior location. *J Am Coll Cardiol* 1988;11(3):453-63.
25. Mak KH, Topol EJ. Emerging concepts in the management of acute myocardial infarction in patients with diabetes mellitus. *J Am Coll Cardiol* 2000;35(3):563-8.
26. Bagai A, Huang Z, Likhnygina Y, et al. Magnitude of troponin elevation and long-term clinical outcomes in acute coronary syndrome patients treated with and without revascularization. *Circ Cardiovasc Interv* 2015;8(6):e002314. doi: 10.1161/CIRCINTERVENTIONS.115.002314

- 1
- 2
- 3
- 4 27. Kaul P, Ezekowitz JA, Armstrong PW, et al. Incidence of heart failure and mortality after
- 5 acute coronary syndromes. *Am Heart J* 2013;165(3):385.e2. doi:
- 6 10.1016/j.ahj.2012.12.005
- 7
- 8 28. Plein S, Younger JF, Sparrow P, et al. Cardiovascular magnetic resonance of scar and
- 9 ischemia burden early after acute ST elevation and non-ST elevation myocardial
- 10 infarction. *J Cardiovasc Magn Reson* 2008;10:47. doi: 10.1186/1532-429X-10-47
- 11
- 12 29. Eitel I, Stiermaier T, Lange T, et al. Cardiac Magnetic Resonance Myocardial Feature
- 13 Tracking for Optimized Prediction of Cardiovascular Events Following Myocardial
- 14 Infarction. *JACC Cardiovasc Imaging* 2018;11(10):1433-44. doi:
- 15 10.1016/j.jcmg.2017.11.034 [published Online First: 2018/02/20]
- 16
- 17 30. Eitel I, Desch S, Fuernau G, et al. Prognostic significance and determinants of myocardial
- 18 salvage assessed by cardiovascular magnetic resonance in acute reperfused
- 19 myocardial infarction. *J Am Coll Cardiol* 2010;55(22):2470-9. doi:
- 20 10.1016/j.jacc.2010.01.049
- 21
- 22 31. Mather AN, Fairbairn TA, Artis NJ, et al. Timing of Cardiovascular MR Imaging after Acute
- 23 Myocardial Infarction : Effect on Estimates of Infarct Characteristics and Prediction of
- 24 Late Ventricular Remodeling. *Radiology* 2011;261:116-26.
- 25
- 26 32. Selvanayagam JB, Porto I, Channon K, et al. Troponin elevation after percutaneous
- 27 coronary intervention directly represents the extent of irreversible myocardial injury:
- 28 insights from cardiovascular magnetic resonance imaging. *Circulation*
- 29 2005;111(8):1027-32. doi: 10.1161/01.CIR.0000156328.28485.AD [published Online
- 30 First: 2005/02/23]
- 31
- 32 33. McCann GP, Khan JN, Greenwood JP, et al. Complete Versus Lesion-Only Primary PCI: The
- 33 Randomized Cardiovascular MR CvLPRIT Substudy. *J Am Coll Cardiol*
- 34 2015;66(24):2713-24. doi: 10.1016/j.jacc.2015.09.099 [published Online First:
- 35 2015/12/25]
- 36
- 37 34. Singh A, Greenwood JP, Berry C, et al. Comparison of exercise testing and CMR measured
- 38 myocardial perfusion reserve for predicting outcome in asymptomatic aortic stenosis:
- 39 the PRognostic Importance of MIcrovascular Dysfunction in Aortic Stenosis (PRIMID
- 40 AS) Study. *Eur Heart J* 2017;38(16):1222-29. doi: 10.1093/eurheartj/ehx001
- 41 [published Online First: 2017/02/17]
- 42
- 43 35. NHS England. Next steps on NHS response to COVID-19: Letter from Sir Simon Stevens and
- 44 Amanda Pritchard 2020 [Available from:
- 45 [https://www.england.nhs.uk/coronavirus/wp-](https://www.england.nhs.uk/coronavirus/wp-content/uploads/sites/52/2020/03/20200317-NHS-COVID-letter-FINAL.pdf)
- 46 [content/uploads/sites/52/2020/03/20200317-NHS-COVID-letter-FINAL.pdf](https://www.england.nhs.uk/coronavirus/wp-content/uploads/sites/52/2020/03/20200317-NHS-COVID-letter-FINAL.pdf) accessed
- 47 8th December 2020.
- 48
- 49 36. Mafham MM, Spata E, Goldacre R, et al. COVID-19 pandemic and admission rates for and
- 50 management of acute coronary syndromes in England. *Lancet* 2020 doi:
- 51 10.1016/S0140-6736(20)31356-8 [published Online First: 2020/07/18]
- 52
- 53 37. Wu J, Mamas M, Rashid M, et al. Patient response, treatments and mortality for acute
- 54 myocardial infarction during the COVID-19 pandemic. *Eur Heart J Qual Care Clin*
- 55 *Outcomes* 2020 doi: 10.1093/ehjqcco/qcaa062 [published Online First: 2020/07/31]
- 56
- 57 38. Shoaib A, Van Spall HGC, Wu J, et al. Substantial decline in hospital admissions for heart
- 58 failure accompanied by increased community mortality during COVID-19 pandemic.
- 59 *Eur Heart J Qual Care Clin Outcomes* 2021 doi: 10.1093/ehjqcco/qcab040 [published
- 60 Online First: 2021/05/28]

- 1  
2  
3  
4  
5  
6  
7  
8  
9  
10  
11  
12  
13  
14  
15  
16  
17  
18  
19  
20  
21  
22  
23  
24  
25  
26  
27  
28  
29  
30  
31  
32  
33  
34  
35  
36  
37  
38  
39  
40  
41  
42  
43  
44  
45  
46  
47  
48  
49  
50  
51  
52  
53  
54  
55  
56  
57  
58  
59  
60
39. Wu J, Mamas MA, de Belder MA, et al. Second Decline in Admissions With Heart Failure and Myocardial Infarction During the COVID-19 Pandemic. *J Am Coll Cardiol* 2021;77(8):1141-43. doi: 10.1016/j.jacc.2020.12.039 [published Online First: 2021/01/24]
  40. National Institute for Health Research. DHSC issues guidance on the impact of COVID-19 on research funded or supported by NIHR, updated 19 Mar 2020 [Available from: <https://www.nihr.ac.uk/news/dhsc-issues-guidance-on-the-impact-on-covid-19-on-research-funded-or-supported-by-nihr/24469>].
  41. van Dorn A. COVID-19 and readjusting clinical trials. *Lancet* 2020;396(10250):523-24. doi: 10.1016/S0140-6736(20)31787-6 [published Online First: 2020/08/24]
  42. Kwok CS, Gale CP, Curzen N, et al. Impact of the COVID-19 Pandemic on Percutaneous Coronary Intervention in England: Insights From the British Cardiovascular Intervention Society PCI Database Cohort. *Circ Cardiovasc Interv* 2020;13(11):e009654. doi: 10.1161/CIRCINTERVENTIONS.120.009654 [published Online First: 2020/11/04]
  43. Hall M, Dondo TB, Yan AT, et al. Association of Clinical Factors and Therapeutic Strategies With Improvements in Survival Following Non-ST-Elevation Myocardial Infarction, 2003-2013. *JAMA* 2016;316(10):1073-82. doi: 10.1001/jama.2016.10766 [published Online First: 2016/08/31]

## Acknowledgements

The authors would like to acknowledge the support of the National Institute for Health Research Biomedical Research Centre in Leicester and the Leeds National Institute for Health Research Clinical Research Facility.

## Author statement

AHG, GPM, ASB, APB, NC, CB, MF and MD conceived the idea for the study. AHG, GPM, ASB and MF designed the study protocol. TAK drafted the manuscript. SB provided statistical support. All authors critically reviewed and approved the final draft of the manuscript.

## Funding

The work was supported by the British Heart Foundation (grant number: CS/17/1/32445). The grant providers were not involved in study design, data acquisition or management, or analysis and writing of final reports.

## Competing interests

CB is employed by the University of Glasgow which holds consultancy and research agreements for his work with Abbott Vascular, AstraZeneca, Boehringer Ingelheim, Causeway Therapeutics, Coroventis, Genentech, GSK, HeartFlow, Menarini, Neovasc, Siemens Healthcare, and Valo Health. The other co-authors have no relevant disclosures.

## Ethics and dissemination

The trial is conducted in accordance with the principles of the 1996 Helsinki Declarations, International Conference on Harmonisation-Good Clinical Practice Guidelines (ICH-GCP). It is

1  
2  
3 anticipated that data collection will be completed by December 2021. The study results will  
4  
5 be submitted for publication within 6 months of completion.  
6  
7  
8  
9

### 10 **Data statement**

11  
12 The deidentified participant data will be available upon reasonable request.  
13  
14  
15  
16  
17  
18  
19  
20  
21  
22  
23  
24  
25  
26  
27  
28  
29  
30  
31  
32  
33  
34  
35  
36  
37  
38  
39  
40  
41  
42  
43  
44  
45  
46  
47  
48  
49  
50  
51  
52  
53  
54  
55  
56  
57  
58  
59  
60

1  
2  
3 **Figure Legends**  
4  
5

6 **Figure 1: RAPID N-STEMI study flow diagram**  
7  
8

9 CMR: cardiac magnetic resonance; ECG: electrocardiogram; hs-Tn: high sensitivity troponin  
10 N-STEMI: non-ST elevation myocardial infarction; OMT: optimal medical therapy; SAQ: Seattle  
11 Angina Questionnaire; STEMI: ST elevation myocardial infarction; ULN: upper limit of normal  
12  
13  
14  
15  
16  
17  
18  
19  
20  
21  
22  
23  
24  
25  
26  
27  
28  
29  
30  
31  
32  
33  
34  
35  
36  
37  
38  
39  
40  
41  
42  
43  
44  
45  
46  
47  
48  
49  
50  
51  
52  
53  
54  
55  
56  
57  
58  
59  
60



**Table 1: Higher-risk N-STEMI (GRACE score >140) subgroup analyses from randomised studies comparing early and delayed invasive strategies**

| Trial                            | Patients | Time to ICA: early (median & IQR, h) | Time to ICA: delayed (median & IQR, h) | Primary outcome                                                                            | Results                                                                     |
|----------------------------------|----------|--------------------------------------|----------------------------------------|--------------------------------------------------------------------------------------------|-----------------------------------------------------------------------------|
| TIMACS 2009 <sup>9</sup>         | 961      | 14.0 (3.0 – 21.0)                    | 50.0 (41.0 – 81.0)                     | 6-month death, non-fatal MI, stroke                                                        | Early = 13.9%<br>Delayed = 21.0%<br>HR 0.65, 95% CI 0.48-0.89,<br>p = 0.006 |
| ELISA-3 2013 <sup>12</sup>       | 224      | 2.6 (1.2 – 6.2)                      | 54.9 (44.2 – 74.5)                     | 30-day death, non-fatal MI, recurrent ischaemia                                            | Early = 10.5%<br>Delayed = 19.1%<br>HR 0.55, 95% CI 0.29-1.10,<br>p=0.26    |
| RIDDLE-NSTEMI 2016 <sup>14</sup> | 123      | 1.4 (1.0 – 2.2)                      | 61.0 (35.8 – 85.0)                     | 30-day death, non-fatal MI                                                                 | Early = 10.7%<br>Delayed = 17.9%<br>HR 0.56, 95% CI 0.21-1.51<br>p=0.12     |
| VERDICT 2018 <sup>15</sup>       | 1025     | 4.7 (3.0 – 12.2)                     | 61.6 (39.4 – 87.8)                     | Death, non-fatal MI, refractory ischaemia, admission for heart failure at median 4.3 years | Early = 34.0%<br>Delayed = 40.1%<br>HR 0.81, 95% CI 0.66-0.99,<br>p = 0.023 |

CI: confidence interval; HR: hazard ratio; ICA: invasive coronary angiography; IQR: interquartile range; MI: myocardial infarction

**Table 2: RAPID N-STEMI inclusion and exclusion criteria**

| Inclusion criteria                                                                                                                                                                                                                                                                                                                                                                             | Exclusion criteria                                                                                               |
|------------------------------------------------------------------------------------------------------------------------------------------------------------------------------------------------------------------------------------------------------------------------------------------------------------------------------------------------------------------------------------------------|------------------------------------------------------------------------------------------------------------------|
| >18 years of age                                                                                                                                                                                                                                                                                                                                                                               | ST elevation myocardial infarction                                                                               |
| Clinical diagnosis of N-STEMI comprising: <ul style="list-style-type: none"> <li>Cardiovascular symptoms suggestive of myocardial ischaemia</li> <li>Elevated high-sensitivity troponin I or T</li> </ul>                                                                                                                                                                                      | Evident type 2 myocardial infarction                                                                             |
| Symptoms <12 hours prior to admission                                                                                                                                                                                                                                                                                                                                                          | Previous known cardiomyopathy                                                                                    |
| GRACE 2.0 score $\geq 118$ or if GRACE 2.0 score $\geq 90$ but $< 118$ must have at least one high-risk feature: <ul style="list-style-type: none"> <li>Anterior location of ECG changes (V2-V5)</li> <li>ST segment depression in 2 contiguous leads of 0.15mV/1.5mm</li> <li>Diabetes mellitus on medication</li> <li>Elevated high-sensitivity troponin 3x upper limit of normal</li> </ul> | Need for urgent PCI according to ESC Guidelines (haemodynamic instability, VT, VF, recurrent or persistent pain) |
| Intention to perform angiography and, if indicated, follow-on revascularisation                                                                                                                                                                                                                                                                                                                | Cardiogenic shock                                                                                                |
| Provision of verbal assent followed by written informed consent                                                                                                                                                                                                                                                                                                                                | Severe valvular heart disease                                                                                    |
|                                                                                                                                                                                                                                                                                                                                                                                                | Any contraindication to PCI                                                                                      |
|                                                                                                                                                                                                                                                                                                                                                                                                | Current participation in another intervention trial                                                              |

ECG: electrocardiogram; ESC: European Society of Cardiology; GRACE: Global Registry of Acute Coronary Events; N-STEMI: non-ST elevation myocardial infarction; PCI: percutaneous coronary intervention; VF: ventricular fibrillation; VT: ventricular tachycardia

**Table 3: RAPID N-STEMI study endpoints**

| Primary outcome                                                                                    | Secondary outcomes                                                         |
|----------------------------------------------------------------------------------------------------|----------------------------------------------------------------------------|
| All-cause mortality, non-fatal myocardial infarction, and admission for heart failure at 12 months | Individual components of primary composite outcome                         |
|                                                                                                    | Cardiovascular mortality                                                   |
|                                                                                                    | Ischaemia-driven revascularisation                                         |
|                                                                                                    | BARC 3-5 major bleeding                                                    |
|                                                                                                    | Stroke                                                                     |
|                                                                                                    | Length of inpatient stay                                                   |
|                                                                                                    | Admission for any cause                                                    |
|                                                                                                    | Events prior to angiography                                                |
|                                                                                                    | Quality of life (Seattle Angina Questionnaire and EQ-5D-5L questionnaires) |
|                                                                                                    | Cost-efficacy analysis                                                     |
|                                                                                                    | Proportion of patients requiring emergency revascularisation in group B    |
|                                                                                                    | Total VARC-2 classified access site complications                          |
| Major VARC-2 classified access site complications                                                  |                                                                            |

BARC: Bleeding Academic Research Consortium; VARC: Vascular Access Research Consortium

**Table 4: RAPID N-STEMI CMR study endpoints**

| Primary outcome                        | Secondary outcomes                             |
|----------------------------------------|------------------------------------------------|
| Infarct size (% left ventricular mass) | Left ventricular volumes and ejection fraction |
|                                        | Myocardial salvage index                       |
|                                        | Extracellular volume                           |
|                                        | Ischaemic burden                               |
|                                        | Global myocardial strain                       |

1  
2  
3  
4  
5  
6  
7  
8  
9  
10  
11  
12  
13  
14  
15  
16  
17  
18  
19  
20  
21  
22  
23  
24  
25  
26  
27  
28  
29  
30  
31  
32  
33  
34  
35  
36  
37  
38  
39  
40  
41  
42  
43  
44  
45  
46  
47  
48  
49  
50  
51  
52  
53  
54  
55  
56  
57  
58  
59  
60

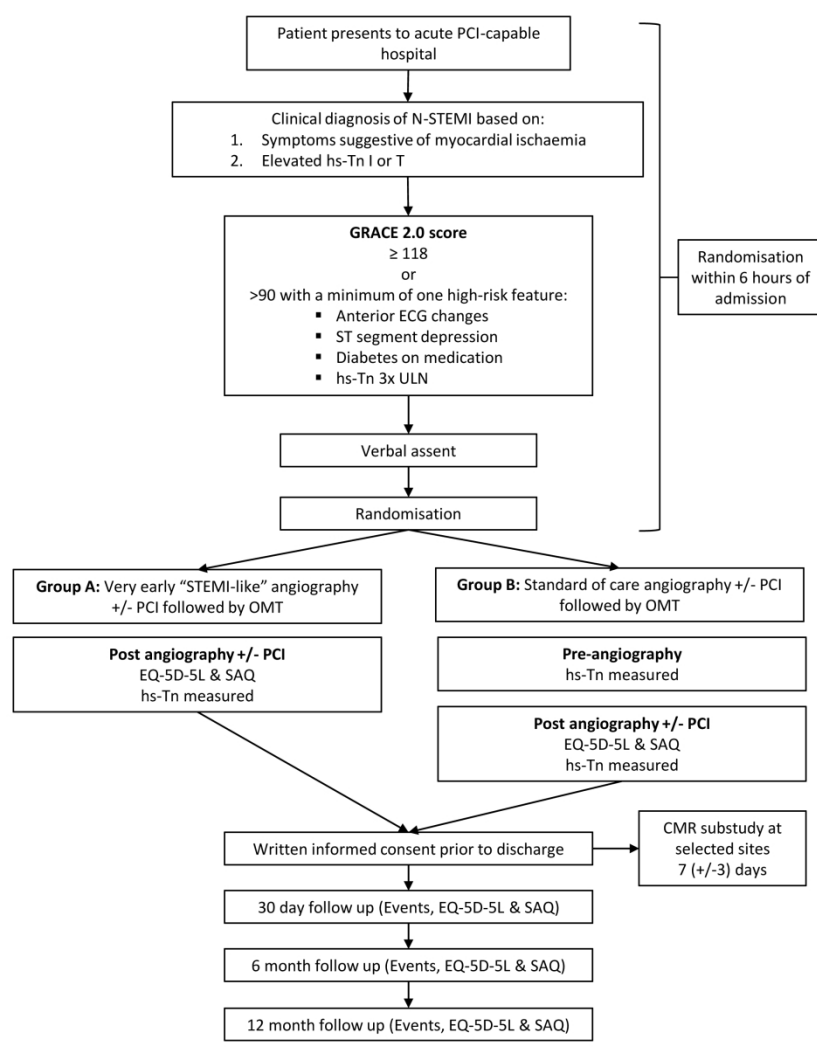

190x268mm (300 x 300 DPI)

# Reporting checklist for protocol of a clinical trial.

Based on the SPIRIT guidelines.

## Instructions to authors

Complete this checklist by entering the page numbers from your manuscript where readers will find each of the items listed below.

Your article may not currently address all the items on the checklist. Please modify your text to include the missing information. If you are certain that an item does not apply, please write "n/a" and provide a short explanation.

Upload your completed checklist as an extra file when you submit to a journal.

In your methods section, say that you used the SPIRIT reporting guidelines, and cite them as:

Chan A-W, Tetzlaff JM, Gøtzsche PC, Altman DG, Mann H, Berlin J, Dickersin K, Hróbjartsson A, Schulz KF, Parulekar WR, Krleža-Jerić K, Laupacis A, Moher D. SPIRIT 2013 Explanation and Elaboration: Guidance for protocols of clinical trials. *BMJ*. 2013;346:e7586

|                                             |                     | Reporting Item                                                                                               | Page Number |
|---------------------------------------------|---------------------|--------------------------------------------------------------------------------------------------------------|-------------|
| <b>Administrative information</b>           |                     |                                                                                                              |             |
| Title                                       | <a href="#">#1</a>  | Descriptive title identifying the study design, population, interventions, and, if applicable, trial acronym | 1           |
| Trial registration                          | <a href="#">#2a</a> | Trial identifier and registry name. If not yet registered, name of intended registry                         | 2           |
| Trial registration: data set                | <a href="#">#2b</a> | All items from the World Health Organization Trial Registration Data Set                                     | 2           |
| Protocol version                            | <a href="#">#3</a>  | Date and version identifier                                                                                  | 3           |
| Funding                                     | <a href="#">#4</a>  | Sources and types of financial, material, and other support                                                  | 20          |
| Roles and responsibilities: contributorship | <a href="#">#5a</a> | Names, affiliations, and roles of protocol contributors                                                      | 20          |

|    |                           |                     |                                                                      |    |
|----|---------------------------|---------------------|----------------------------------------------------------------------|----|
| 1  | Roles and                 | <a href="#">#5b</a> | Name and contact information for the trial sponsor                   | 8  |
| 2  | responsibilities:         |                     |                                                                      |    |
| 3  | sponsor contact           |                     |                                                                      |    |
| 4  | information               |                     |                                                                      |    |
| 5  |                           |                     |                                                                      |    |
| 6  |                           |                     |                                                                      |    |
| 7  |                           |                     |                                                                      |    |
| 8  | Roles and                 | <a href="#">#5c</a> | Role of study sponsor and funders, if any, in study design;          | 20 |
| 9  | responsibilities:         |                     | collection, management, analysis, and interpretation of data;        |    |
| 10 | sponsor and funder        |                     | writing of the report; and the decision to submit the report for     |    |
| 11 |                           |                     | publication, including whether they will have ultimate authority     |    |
| 12 |                           |                     | over any of these activities                                         |    |
| 13 |                           |                     |                                                                      |    |
| 14 |                           |                     |                                                                      |    |
| 15 |                           |                     |                                                                      |    |
| 16 | Roles and                 | <a href="#">#5d</a> | Composition, roles, and responsibilities of the coordinating centre, | 11 |
| 17 | responsibilities:         |                     | steering committee, endpoint adjudication committee, data            |    |
| 18 | committees                |                     | management team, and other individuals or groups overseeing the      |    |
| 19 |                           |                     | trial, if applicable (see Item 21a for data monitoring committee)    |    |
| 20 |                           |                     |                                                                      |    |
| 21 |                           |                     |                                                                      |    |
| 22 |                           |                     |                                                                      |    |
| 23 | <b>Introduction</b>       |                     |                                                                      |    |
| 24 |                           |                     |                                                                      |    |
| 25 | Background and            | <a href="#">#6a</a> | Description of research question and justification for undertaking   | 5  |
| 26 | rationale                 |                     | the trial, including summary of relevant studies (published and      |    |
| 27 |                           |                     | unpublished) examining benefits and harms for each intervention      |    |
| 28 |                           |                     |                                                                      |    |
| 29 |                           |                     |                                                                      |    |
| 30 | Background and            | <a href="#">#6b</a> | Explanation for choice of comparators                                | 5  |
| 31 | rationale: choice of      |                     |                                                                      |    |
| 32 | comparators               |                     |                                                                      |    |
| 33 |                           |                     |                                                                      |    |
| 34 |                           |                     |                                                                      |    |
| 35 |                           |                     |                                                                      |    |
| 36 | Objectives                | <a href="#">#7</a>  | Specific objectives or hypotheses                                    | 6  |
| 37 |                           |                     |                                                                      |    |
| 38 | Trial design              | <a href="#">#8</a>  | Description of trial design including type of trial (eg, parallel    | 6  |
| 39 |                           |                     | group, crossover, factorial, single group), allocation ratio, and    |    |
| 40 |                           |                     | framework (eg, superiority, equivalence, non-inferiority,            |    |
| 41 |                           |                     | exploratory)                                                         |    |
| 42 |                           |                     |                                                                      |    |
| 43 |                           |                     |                                                                      |    |
| 44 |                           |                     |                                                                      |    |
| 45 | <b>Methods:</b>           |                     |                                                                      |    |
| 46 | <b>Participants,</b>      |                     |                                                                      |    |
| 47 | <b>interventions, and</b> |                     |                                                                      |    |
| 48 | <b>outcomes</b>           |                     |                                                                      |    |
| 49 |                           |                     |                                                                      |    |
| 50 |                           |                     |                                                                      |    |
| 51 | Study setting             | <a href="#">#9</a>  | Description of study settings (eg, community clinic, academic        | 6  |
| 52 |                           |                     | hospital) and list of countries where data will be collected.        |    |
| 53 |                           |                     | Reference to where list of study sites can be obtained               |    |
| 54 |                           |                     |                                                                      |    |
| 55 |                           |                     |                                                                      |    |
| 56 |                           |                     |                                                                      |    |
| 57 | Eligibility criteria      | <a href="#">#10</a> | Inclusion and exclusion criteria for participants. If applicable,    | 7  |
| 58 |                           |                     | eligibility criteria for study centres and individuals who will      |    |
| 59 |                           |                     |                                                                      |    |
| 60 |                           |                     |                                                                      |    |

|    |                              |                                                                                            |    |
|----|------------------------------|--------------------------------------------------------------------------------------------|----|
|    |                              | perform the interventions (eg, surgeons, psychotherapists)                                 |    |
| 1  |                              |                                                                                            |    |
| 2  | Interventions:               | <a href="#">#11a</a> Interventions for each group with sufficient detail to allow          | 7  |
| 3  | description                  | replication, including how and when they will be administered                              |    |
| 4  |                              |                                                                                            |    |
| 5  | Interventions:               | <a href="#">#11b</a> Criteria for discontinuing or modifying allocated interventions for a | 7  |
| 6  | modifications                | given trial participant (eg, drug dose change in response to harms,                        |    |
| 7  |                              | participant request, or improving / worsening disease)                                     |    |
| 8  |                              |                                                                                            |    |
| 9  | Interventions:               | <a href="#">#11c</a> Strategies to improve adherence to intervention protocols, and any    | 7  |
| 10 | adherence                    | procedures for monitoring adherence (eg, drug tablet return;                               |    |
| 11 |                              | laboratory tests)                                                                          |    |
| 12 | Interventions:               | <a href="#">#11d</a> Relevant concomitant care and interventions that are permitted or     | 7  |
| 13 | concomitant care             | prohibited during the trial                                                                |    |
| 14 |                              |                                                                                            |    |
| 15 | Outcomes                     | <a href="#">#12</a> Primary, secondary, and other outcomes, including the specific         | 10 |
| 16 |                              | measurement variable (eg, systolic blood pressure), analysis metric                        |    |
| 17 |                              | (eg, change from baseline, final value, time to event), method of                          |    |
| 18 |                              | aggregation (eg, median, proportion), and time point for each                              |    |
| 19 |                              | outcome. Explanation of the clinical relevance of chosen efficacy                          |    |
| 20 |                              | and harm outcomes is strongly recommended                                                  |    |
| 21 | Participant timeline         | <a href="#">#13</a> Time schedule of enrolment, interventions (including any run-ins       | 10 |
| 22 |                              | and washouts), assessments, and visits for participants. A                                 |    |
| 23 |                              | schematic diagram is highly recommended (see Figure)                                       |    |
| 24 |                              |                                                                                            |    |
| 25 | Sample size                  | <a href="#">#14</a> Estimated number of participants needed to achieve study               | 10 |
| 26 |                              | objectives and how it was determined, including clinical and                               |    |
| 27 |                              | statistical assumptions supporting any sample size calculations                            |    |
| 28 |                              |                                                                                            |    |
| 29 | Recruitment                  | <a href="#">#15</a> Strategies for achieving adequate participant enrolment to reach       | 10 |
| 30 |                              | target sample size                                                                         |    |
| 31 |                              |                                                                                            |    |
| 32 |                              |                                                                                            |    |
| 33 |                              |                                                                                            |    |
| 34 |                              |                                                                                            |    |
| 35 |                              |                                                                                            |    |
| 36 |                              |                                                                                            |    |
| 37 |                              |                                                                                            |    |
| 38 |                              |                                                                                            |    |
| 39 |                              |                                                                                            |    |
| 40 |                              |                                                                                            |    |
| 41 |                              |                                                                                            |    |
| 42 |                              |                                                                                            |    |
| 43 |                              |                                                                                            |    |
| 44 |                              |                                                                                            |    |
| 45 | <b>Methods: Assignment</b>   |                                                                                            |    |
| 46 | <b>of interventions (for</b> |                                                                                            |    |
| 47 | <b>controlled trials)</b>    |                                                                                            |    |
| 48 |                              |                                                                                            |    |
| 49 |                              |                                                                                            |    |
| 50 | Allocation: sequence         | <a href="#">#16a</a> Method of generating the allocation sequence (eg, computer-           | 7  |
| 51 | generation                   | generated random numbers), and list of any factors for                                     |    |
| 52 |                              | stratification. To reduce predictability of a random sequence,                             |    |
| 53 |                              | details of any planned restriction (eg, blocking) should be provided                       |    |
| 54 |                              | in a separate document that is unavailable to those who enrol                              |    |
| 55 |                              | participants or assign interventions                                                       |    |
| 56 |                              |                                                                                            |    |
| 57 |                              |                                                                                            |    |
| 58 |                              |                                                                                            |    |
| 59 |                              |                                                                                            |    |
| 60 |                              |                                                                                            |    |



|    |                        |                      |                                                                       |    |
|----|------------------------|----------------------|-----------------------------------------------------------------------|----|
| 1  | Allocation concealment | <a href="#">#16b</a> | Mechanism of implementing the allocation sequence (eg, central        | 7  |
| 2  | mechanism              |                      | telephone; sequentially numbered, opaque, sealed envelopes),          |    |
| 3  |                        |                      | describing any steps to conceal the sequence until interventions are  |    |
| 4  |                        |                      | assigned                                                              |    |
| 5  |                        |                      |                                                                       |    |
| 6  |                        |                      |                                                                       |    |
| 7  |                        |                      |                                                                       |    |
| 8  | Allocation:            | <a href="#">#16c</a> | Who will generate the allocation sequence, who will enrol             | 7  |
| 9  | implementation         |                      | participants, and who will assign participants to interventions       |    |
| 10 |                        |                      |                                                                       |    |
| 11 | Blinding (masking)     | <a href="#">#17a</a> | Who will be blinded after assignment to interventions (eg, trial      | 7  |
| 12 |                        |                      | participants, care providers, outcome assessors, data analysts), and  |    |
| 13 |                        |                      | how                                                                   |    |
| 14 |                        |                      |                                                                       |    |
| 15 |                        |                      |                                                                       |    |
| 16 |                        |                      |                                                                       |    |
| 17 | Blinding (masking):    | <a href="#">#17b</a> | If blinded, circumstances under which unblinding is permissible,      | 7  |
| 18 | emergency unblinding   |                      | and procedure for revealing a participant's allocated intervention    |    |
| 19 |                        |                      | during the trial                                                      |    |
| 20 |                        |                      |                                                                       |    |
| 21 |                        |                      |                                                                       |    |
| 22 | <b>Methods: Data</b>   |                      |                                                                       |    |
| 23 | <b>collection,</b>     |                      |                                                                       |    |
| 24 | <b>management, and</b> |                      |                                                                       |    |
| 25 | <b>analysis</b>        |                      |                                                                       |    |
| 26 |                        |                      |                                                                       |    |
| 27 |                        |                      |                                                                       |    |
| 28 |                        |                      |                                                                       |    |
| 29 | Data collection plan   | <a href="#">#18a</a> | Plans for assessment and collection of outcome, baseline, and other   | 8  |
| 30 |                        |                      | trial data, including any related processes to promote data quality   |    |
| 31 |                        |                      | (eg, duplicate measurements, training of assessors) and a             |    |
| 32 |                        |                      | description of study instruments (eg, questionnaires, laboratory      |    |
| 33 |                        |                      | tests) along with their reliability and validity, if known. Reference |    |
| 34 |                        |                      | to where data collection forms can be found, if not in the protocol   |    |
| 35 |                        |                      |                                                                       |    |
| 36 |                        |                      |                                                                       |    |
| 37 |                        |                      |                                                                       |    |
| 38 |                        |                      |                                                                       |    |
| 39 | Data collection plan:  | <a href="#">#18b</a> | Plans to promote participant retention and complete follow-up,        | 8  |
| 40 | retention              |                      | including list of any outcome data to be collected for participants   |    |
| 41 |                        |                      | who discontinue or deviate from intervention protocols                |    |
| 42 |                        |                      |                                                                       |    |
| 43 |                        |                      |                                                                       |    |
| 44 | Data management        | <a href="#">#19</a>  | Plans for data entry, coding, security, and storage, including any    | 8  |
| 45 |                        |                      | related processes to promote data quality (eg, double data entry;     |    |
| 46 |                        |                      | range checks for data values). Reference to where details of data     |    |
| 47 |                        |                      | management procedures can be found, if not in the protocol            |    |
| 48 |                        |                      |                                                                       |    |
| 49 |                        |                      |                                                                       |    |
| 50 |                        |                      |                                                                       |    |
| 51 | Statistics: outcomes   | <a href="#">#20a</a> | Statistical methods for analysing primary and secondary outcomes.     | 11 |
| 52 |                        |                      | Reference to where other details of the statistical analysis plan can |    |
| 53 |                        |                      | be found, if not in the protocol                                      |    |
| 54 |                        |                      |                                                                       |    |
| 55 |                        |                      |                                                                       |    |
| 56 | Statistics: additional | <a href="#">#20b</a> | Methods for any additional analyses (eg, subgroup and adjusted        | 11 |
| 57 | analyses               |                      | analyses)                                                             |    |
| 58 |                        |                      |                                                                       |    |
| 59 |                        |                      |                                                                       |    |
| 60 |                        |                      |                                                                       |    |

|    |                            |                      |                                                                         |     |
|----|----------------------------|----------------------|-------------------------------------------------------------------------|-----|
| 1  | Statistics: analysis       | <a href="#">#20c</a> | Definition of analysis population relating to protocol non-             | 11  |
| 2  | population and missing     |                      | adherence (eg, as randomised analysis), and any statistical methods     |     |
| 3  | data                       |                      | to handle missing data (eg, multiple imputation)                        |     |
| 4  |                            |                      |                                                                         |     |
| 5  |                            |                      |                                                                         |     |
| 6  | <b>Methods: Monitoring</b> |                      |                                                                         |     |
| 7  |                            |                      |                                                                         |     |
| 8  | Data monitoring:           | <a href="#">#21a</a> | Composition of data monitoring committee (DMC); summary of its          | 11  |
| 9  | formal committee           |                      | role and reporting structure; statement of whether it is independent    |     |
| 10 |                            |                      | from the sponsor and competing interests; and reference to where        |     |
| 11 |                            |                      | further details about its charter can be found, if not in the protocol. |     |
| 12 |                            |                      | Alternatively, an explanation of why a DMC is not needed                |     |
| 13 |                            |                      |                                                                         |     |
| 14 | Data monitoring:           | <a href="#">#21b</a> | Description of any interim analyses and stopping guidelines,            | n/a |
| 15 | interim analysis           |                      | including who will have access to these interim results and make        |     |
| 16 |                            |                      | the final decision to terminate the trial                               |     |
| 17 |                            |                      |                                                                         |     |
| 18 |                            |                      |                                                                         |     |
| 19 |                            |                      |                                                                         |     |
| 20 |                            |                      |                                                                         |     |
| 21 |                            |                      |                                                                         |     |
| 22 | Harms                      | <a href="#">#22</a>  | Plans for collecting, assessing, reporting, and managing solicited      | n/a |
| 23 |                            |                      | and spontaneously reported adverse events and other unintended          |     |
| 24 |                            |                      | effects of trial interventions or trial conduct                         |     |
| 25 |                            |                      |                                                                         |     |
| 26 |                            |                      |                                                                         |     |
| 27 | Auditing                   | <a href="#">#23</a>  | Frequency and procedures for auditing trial conduct, if any, and        | n/a |
| 28 |                            |                      | whether the process will be independent from investigators and the      |     |
| 29 |                            |                      | sponsor                                                                 |     |
| 30 |                            |                      |                                                                         |     |
| 31 |                            |                      |                                                                         |     |
| 32 |                            |                      |                                                                         |     |
| 33 | <b>Ethics and</b>          |                      |                                                                         |     |
| 34 | <b>dissemination</b>       |                      |                                                                         |     |
| 35 |                            |                      |                                                                         |     |
| 36 |                            |                      |                                                                         |     |
| 37 | Research ethics            | <a href="#">#24</a>  | Plans for seeking research ethics committee / institutional review      | 8   |
| 38 | approval                   |                      | board (REC / IRB) approval                                              |     |
| 39 |                            |                      |                                                                         |     |
| 40 |                            |                      |                                                                         |     |
| 41 | Protocol amendments        | <a href="#">#25</a>  | Plans for communicating important protocol modifications (eg,           | n/a |
| 42 |                            |                      | changes to eligibility criteria, outcomes, analyses) to relevant        |     |
| 43 |                            |                      | parties (eg, investigators, REC / IRBs, trial participants, trial       |     |
| 44 |                            |                      | registries, journals, regulators)                                       |     |
| 45 |                            |                      |                                                                         |     |
| 46 |                            |                      |                                                                         |     |
| 47 | Consent or assent          | <a href="#">#26a</a> | Who will obtain informed consent or assent from potential trial         | n/a |
| 48 |                            |                      | participants or authorised surrogates, and how (see Item 32)            |     |
| 49 |                            |                      |                                                                         |     |
| 50 |                            |                      |                                                                         |     |
| 51 | Consent or assent:         | <a href="#">#26b</a> | Additional consent provisions for collection and use of participant     | n/a |
| 52 | ancillary studies          |                      | data and biological specimens in ancillary studies, if applicable       |     |
| 53 |                            |                      |                                                                         |     |
| 54 |                            |                      |                                                                         |     |
| 55 | Confidentiality            | <a href="#">#27</a>  | How personal information about potential and enrolled participants      | n/a |
| 56 |                            |                      | will be collected, shared, and maintained in order to protect           |     |
| 57 |                            |                      | confidentiality before, during, and after the trial                     |     |
| 58 |                            |                      |                                                                         |     |
| 59 |                            |                      |                                                                         |     |
| 60 |                            |                      |                                                                         |     |

|    |                                             |                      |                                                                                                                                                                                                                                                                                     |     |
|----|---------------------------------------------|----------------------|-------------------------------------------------------------------------------------------------------------------------------------------------------------------------------------------------------------------------------------------------------------------------------------|-----|
| 1  | Declaration of interests                    | <a href="#">#28</a>  | Financial and other competing interests for principal investigators for the overall trial and each study site                                                                                                                                                                       | 20  |
| 2  |                                             |                      |                                                                                                                                                                                                                                                                                     |     |
| 3  |                                             |                      |                                                                                                                                                                                                                                                                                     |     |
| 4  |                                             |                      |                                                                                                                                                                                                                                                                                     |     |
| 5  | Data access                                 | <a href="#">#29</a>  | Statement of who will have access to the final trial dataset, and disclosure of contractual agreements that limit such access for investigators                                                                                                                                     | 21  |
| 6  |                                             |                      |                                                                                                                                                                                                                                                                                     |     |
| 7  |                                             |                      |                                                                                                                                                                                                                                                                                     |     |
| 8  |                                             |                      |                                                                                                                                                                                                                                                                                     |     |
| 9  |                                             |                      |                                                                                                                                                                                                                                                                                     |     |
| 10 | Ancillary and post trial care               | <a href="#">#30</a>  | Provisions, if any, for ancillary and post-trial care, and for compensation to those who suffer harm from trial participation                                                                                                                                                       | n/a |
| 11 |                                             |                      |                                                                                                                                                                                                                                                                                     |     |
| 12 |                                             |                      |                                                                                                                                                                                                                                                                                     |     |
| 13 |                                             |                      |                                                                                                                                                                                                                                                                                     |     |
| 14 | Dissemination policy: trial results         | <a href="#">#31a</a> | Plans for investigators and sponsor to communicate trial results to participants, healthcare professionals, the public, and other relevant groups (eg, via publication, reporting in results databases, or other data sharing arrangements), including any publication restrictions | 20  |
| 15 |                                             |                      |                                                                                                                                                                                                                                                                                     |     |
| 16 |                                             |                      |                                                                                                                                                                                                                                                                                     |     |
| 17 |                                             |                      |                                                                                                                                                                                                                                                                                     |     |
| 18 |                                             |                      |                                                                                                                                                                                                                                                                                     |     |
| 19 |                                             |                      |                                                                                                                                                                                                                                                                                     |     |
| 20 |                                             |                      |                                                                                                                                                                                                                                                                                     |     |
| 21 | Dissemination policy: authorship            | <a href="#">#31b</a> | Authorship eligibility guidelines and any intended use of professional writers                                                                                                                                                                                                      | n/a |
| 22 |                                             |                      |                                                                                                                                                                                                                                                                                     |     |
| 23 |                                             |                      |                                                                                                                                                                                                                                                                                     |     |
| 24 | Dissemination policy: reproducible research | <a href="#">#31c</a> | Plans, if any, for granting public access to the full protocol, participant-level dataset, and statistical code                                                                                                                                                                     | 20  |
| 25 |                                             |                      |                                                                                                                                                                                                                                                                                     |     |
| 26 |                                             |                      |                                                                                                                                                                                                                                                                                     |     |
| 27 |                                             |                      |                                                                                                                                                                                                                                                                                     |     |
| 28 | <b>Appendices</b>                           |                      |                                                                                                                                                                                                                                                                                     |     |
| 29 |                                             |                      |                                                                                                                                                                                                                                                                                     |     |
| 30 |                                             |                      |                                                                                                                                                                                                                                                                                     |     |
| 31 | Informed consent materials                  | <a href="#">#32</a>  | Model consent form and other related documentation given to participants and authorised surrogates                                                                                                                                                                                  | n/a |
| 32 |                                             |                      |                                                                                                                                                                                                                                                                                     |     |
| 33 |                                             |                      |                                                                                                                                                                                                                                                                                     |     |
| 34 | Biological specimens                        | <a href="#">#33</a>  | Plans for collection, laboratory evaluation, and storage of biological specimens for genetic or molecular analysis in the current trial and for future use in ancillary studies, if applicable                                                                                      | n/a |
| 35 |                                             |                      |                                                                                                                                                                                                                                                                                     |     |
| 36 |                                             |                      |                                                                                                                                                                                                                                                                                     |     |
| 37 |                                             |                      |                                                                                                                                                                                                                                                                                     |     |
| 38 |                                             |                      |                                                                                                                                                                                                                                                                                     |     |
| 39 |                                             |                      |                                                                                                                                                                                                                                                                                     |     |

40 The SPIRIT Explanation and Elaboration paper is distributed under the terms of the Creative Commons  
 41 Attribution License CC-BY-NC. This checklist was completed on 26. July 2021 using  
 42 <https://www.goodreports.org/>, a tool made by the [EQUATOR Network](#) in collaboration with [Penelope.ai](#)  
 43  
 44  
 45  
 46  
 47  
 48  
 49  
 50  
 51  
 52  
 53  
 54  
 55  
 56  
 57  
 58  
 59

# BMJ Open

## Very early invasive angiography versus standard of care in higher-risk non-ST elevation myocardial infarction: study protocol for the prospective multicentre randomised controlled RAPID N-STEMI trial

|                                 |                                                                                                                                                                                                                                                                                                                                                                                                                                                                                                                                                                                                                                                                                                                                                                                                                                                                                                                                                                                                                                                                                                                                                                                                                                                                     |
|---------------------------------|---------------------------------------------------------------------------------------------------------------------------------------------------------------------------------------------------------------------------------------------------------------------------------------------------------------------------------------------------------------------------------------------------------------------------------------------------------------------------------------------------------------------------------------------------------------------------------------------------------------------------------------------------------------------------------------------------------------------------------------------------------------------------------------------------------------------------------------------------------------------------------------------------------------------------------------------------------------------------------------------------------------------------------------------------------------------------------------------------------------------------------------------------------------------------------------------------------------------------------------------------------------------|
| Journal:                        | <i>BMJ Open</i>                                                                                                                                                                                                                                                                                                                                                                                                                                                                                                                                                                                                                                                                                                                                                                                                                                                                                                                                                                                                                                                                                                                                                                                                                                                     |
| Manuscript ID                   | bmjopen-2021-055878.R1                                                                                                                                                                                                                                                                                                                                                                                                                                                                                                                                                                                                                                                                                                                                                                                                                                                                                                                                                                                                                                                                                                                                                                                                                                              |
| Article Type:                   | Protocol                                                                                                                                                                                                                                                                                                                                                                                                                                                                                                                                                                                                                                                                                                                                                                                                                                                                                                                                                                                                                                                                                                                                                                                                                                                            |
| Date Submitted by the Author:   | 05-Jan-2022                                                                                                                                                                                                                                                                                                                                                                                                                                                                                                                                                                                                                                                                                                                                                                                                                                                                                                                                                                                                                                                                                                                                                                                                                                                         |
| Complete List of Authors:       | Kite, Thomas; Glenfield Hospital, Department of Cardiovascular Sciences<br>Banning, Amerjeet S.; Glenfield Hospital, Department of Cardiovascular Sciences<br>Ladwiniec, Andrew; Glenfield Hospital, Department of Cardiovascular Sciences<br>Gale, Chris; University of Leeds<br>Greenwood, John; Leeds Teaching Hospitals NHS Trust, Cardiology; University of Leeds, Biomedical Imaging Sciences<br>Dalby, Miles; Royal Brompton & Harefield NHS Foundation Trust, Imperial College London; Royal Brompton & Harefield NHS Foundation Trust<br>Hobson, Rachel; University of Leicester<br>Barber, Shaun; University of Leicester<br>Parker, Emma; Glenfield Hospital, Department of Cardiovascular Sciences<br>Berry, Colin; University of Glasgow, British Heart Foundation Glasgow Cardiovascular Research Centre; University of Glasgow<br>Flather, Marcus; University of East Anglia, Norwich Medical School<br>Curzen, Nick; University Hospital Southampton NHS F Trust, Wessex Cardiac Unit<br>Banning, AP; Oxford University Hospitals NHS Foundation Trust, Cardiology Department, Oxford Heart Centre<br>McCann, Gerry; Glenfield Hospital, Department of Cardiovascular Sciences<br>GERSHLICK, ANTHONY; University Hospitals of Leicester, Cardiology |
| <b>Primary Subject Heading</b>: | Cardiovascular medicine                                                                                                                                                                                                                                                                                                                                                                                                                                                                                                                                                                                                                                                                                                                                                                                                                                                                                                                                                                                                                                                                                                                                                                                                                                             |
| Secondary Subject Heading:      | Evidence based practice                                                                                                                                                                                                                                                                                                                                                                                                                                                                                                                                                                                                                                                                                                                                                                                                                                                                                                                                                                                                                                                                                                                                                                                                                                             |
| Keywords:                       | Ischaemic heart disease < CARDIOLOGY, Myocardial infarction < CARDIOLOGY, Coronary intervention < CARDIOLOGY, Coronary heart disease < CARDIOLOGY                                                                                                                                                                                                                                                                                                                                                                                                                                                                                                                                                                                                                                                                                                                                                                                                                                                                                                                                                                                                                                                                                                                   |
|                                 |                                                                                                                                                                                                                                                                                                                                                                                                                                                                                                                                                                                                                                                                                                                                                                                                                                                                                                                                                                                                                                                                                                                                                                                                                                                                     |

1  
2  
3  
4  
5  
6  
7  
8  
9  
10  
11  
12  
13  
14  
15  
16  
17  
18  
19  
20  
21  
22  
23  
24  
25  
26  
27  
28  
29  
30  
31  
32  
33  
34  
35  
36  
37  
38  
39  
40  
41  
42  
43  
44  
45  
46  
47  
48  
49  
50  
51  
52  
53  
54  
55  
56  
57  
58  
59  
60

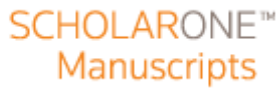

1  
2  
3  
4  
5  
6  
7  
8  
9  
10  
11  
12  
13  
14  
15  
16  
17  
18  
19  
20  
21  
22  
23  
24  
25  
26  
27  
28  
29  
30  
31  
32  
33  
34  
35  
36  
37  
38  
39  
40  
41  
42  
43  
44  
45  
46  
47  
48  
49  
50  
51  
52  
53  
54  
55  
56  
57  
58  
59  
60

**Very early invasive angiography versus standard of care in higher-risk non-ST elevation myocardial infarction: study protocol for the prospective multicentre randomised controlled RAPID N-STEMI trial**

Thomas A. Kite BMedSci (Hons) BM BS MRCP<sup>1</sup>, Amerjeet S. Banning MBBS PhD MRCP<sup>1</sup>, Andrew Ladwiniec MA MD FRCP<sup>1</sup>, Chris P. Gale BSc PhD FRCP<sup>2</sup>, John P. Greenwood MBChB PhD FRCP<sup>2</sup>, Miles Dalby BSc MBBS MD<sup>3</sup>, Rachel Hobson BA(Hons)<sup>4</sup>, Shaun Barber BSc MSc PhD<sup>4</sup>, Emma Parker<sup>1</sup>, Colin Berry MBChB PhD<sup>5</sup>, Marcus Flather MBBS MBA FRCP<sup>6</sup>, Nick Curzen BM (Hons) PhD<sup>7</sup>, Adrian P. Banning MB BS, MD, FRCP<sup>8</sup>, Gerry P. McCann MB ChB, MD<sup>1</sup>, Anthony H. Gershlick BSc MB BS FRCP<sup>1</sup>

**Affiliations:**

1. Department of Cardiovascular Sciences, University of Leicester and the Leicester Biomedical Research Centre, Glenfield Hospital, Leicester, UK
2. Leeds Institute of Cardiovascular and Metabolic Medicine, University of Leeds and the Department of Cardiology Leeds Teaching Hospitals NHS Trust, Leeds, UK
3. Royal Brompton and Harefield NHS Foundation Trust, London, UK
4. Leicester Clinical Trials Unit, University of Leicester, University Road, Leicester, UK
5. Institute of Cardiovascular and Medical Sciences, University of Glasgow, Glasgow, UK
6. Norwich Medical School, University of East Anglia, Norwich, UK
7. Faculty of Medicine, University of Southampton and University Hospital Southampton NHS Trust Southampton, UK
8. John Radcliffe Hospital, Oxford University Hospitals NHS Trust, Oxford, UK

**Corresponding author:**

Dr Thomas A. Kite

Department of Cardiovascular Sciences, University of Leicester and the Leicester Biomedical Research Centre, Glenfield Hospital, Leicester, LE3 9QP, UK

Email: [tom.kite@nhs.net](mailto:tom.kite@nhs.net)

## Abstract

**Background:** There are a paucity of randomised data on the optimal timing of invasive coronary angiography (ICA) in higher-risk patients with non-ST elevation myocardial infarction (N-STEMI). International guideline recommendations for early ICA are primarily based on retrospective subgroup analyses of neutral trials.

**Aims:** The RAPID N-STEMI trial aims to determine whether very early percutaneous revascularisation improves clinical outcomes as compared to a standard of care strategy in higher-risk N-STEMI patients.

**Methods and analysis:** RAPID N-STEMI is a prospective, multi-centre, open-label, randomised-controlled, pragmatic strategy trial. Higher-risk N-STEMI patients, as defined by Global Registry of Acute Coronary Events (GRACE) 2.0 score  $\geq 118$ , or  $>90$  with at least one additional high-risk feature, were randomised to either: very early ICA +/- revascularisation or standard of care timing of ICA +/- revascularisation. The primary outcome is the proportion of participants with at least one of the following events (all-cause mortality, non-fatal myocardial infarction, and hospital admission for heart failure) at 12 months. Key secondary outcomes include major bleeding and stroke. A hypothesis generating cardiac magnetic resonance (CMR) substudy will provide mechanistic data on infarct size, myocardial salvage, and residual ischaemia post percutaneous coronary intervention. On 7<sup>th</sup> April 2021, the sponsor discontinued enrolment due to the impact of the COVID-19 pandemic and lower than expected event rates. 425 patients were enrolled, and 61 patients underwent CMR.

**Ethics and dissemination:** The trial has been reviewed and approved by the East of England Cambridge East Research Ethics Committee (18/EE/0222). The study results will be submitted for publication within 6 months of completion.

## Clinical trial registration

NCT03707314

## Keywords

Non-ST elevation myocardial infarction; percutaneous coronary intervention; timing; invasive strategy; GRACE score

### Strengths and limitations of this study:

-This randomised trial sought to test whether a very early invasive strategy in higher-risk N-STEMI patients improves clinical outcomes compared with standard care. An early invasive strategy in this group is recommended in international guidelines, but is as yet unsupported by the primary outcome of an appropriately sized randomised trial.

-Randomised-controlled pragmatic strategy design.

-A cardiac magnetic resonance sub-study will provide mechanistic data on infarct size, myocardial salvage, and residual ischaemia post-PCI.

-Due to the effects of the COVID-19 pandemic upon clinical services and a lower than expected primary outcome event rate, trial recruitment was terminated early after enrolment of 425 patients (18.4% of intended).

### Background and rationale

Historical data indicate that an invasive strategy during index hospital admission in non-ST elevation myocardial infarction (N-STEMI) improves composite ischaemic outcomes, with maximal benefit seen in those at highest baseline risk for future major adverse cardiovascular events (MACE) (1). However, the optimal timing of invasive coronary angiography (ICA) and whether high-risk subgroups should be treated early remains controversial, despite it being a mandated management strategy in international guidelines (2, 3). Since N-STEMI is



1  
2  
3 characterised by a risk-treatment paradox whereby higher-risk patients are less likely to  
4 receive aggressive pharmacotherapy and invasive management (4), use and timing of ICA can  
5 differ significantly when compared to the precisely defined management of ST elevation  
6 myocardial infarction (STEMI). Clinically unstable patients require urgent revascularisation,  
7 whilst for others, the most appropriate timing of an invasive strategy is less certain.  
8  
9  
10  
11  
12  
13  
14  
15  
16  
17

18 A series of randomised trials have investigated this concept in unselected N-STEMI  
19 populations, thereby testing whether early revascularisation (<24 hours) improves clinical  
20 outcomes as compared to delayed or standard of care approaches (5-18). Differences in study  
21 design, inclusion criteria, timing of ICA and endpoint definitions have resulted in conflicting  
22 results that are challenging to interpret and apply to current practice. When these data are  
23 evaluated in totality, patient level meta-analysis has demonstrated no significant difference  
24 in death or myocardial infarction (MI) between the two strategies (19).  
25  
26  
27  
28  
29  
30  
31  
32  
33  
34  
35  
36  
37

38 The application of the Global Registry of Acute Coronary Events (GRACE) score in prior trial  
39 subgroup analyses has potential for risk stratification of those patients that may benefit most  
40 from expeditious revascularisation (**Table 1**). A GRACE score >140 analysis of 961 patients  
41 from the TIMACS trial showed that an early invasive strategy (14 hours post randomisation)  
42 reduced the risk of death, non-fatal MI, and stroke at 6 months by 35% as compared to a  
43 delayed approach (9). Moreover, the VERDICT study produced a similar finding, albeit in a  
44 subgroup of 1025 GRACE >140 N-STEMI patients who underwent a very early invasive strategy  
45 (4.7 hours post randomisation) (15). However, such analyses should only be considered  
46 hypothesis generating since; 1) the primary outcome in both overall trial populations was  
47  
48  
49  
50  
51  
52  
53  
54  
55  
56  
57  
58  
59  
60

1  
2  
3 neutral, and 2) the studies were undertaken in the era of conventional troponin and CK-MB,  
4  
5 with up to one-quarter of patients exhibiting no biomarker rise (9).  
6  
7  
8  
9

10 Given that currently available data are inconsistent and of insufficient scientific quality to  
11  
12 inform best practice, a contemporary trial that prospectively investigates the timing of  
13  
14 revascularisation in GRACE score defined high-risk N-STEMI is required to confirm or refute  
15  
16 these prior observations.  
17  
18  
19

## 20 21 22 **Methods and analysis**

### 23 24 **Study design and inclusion criteria**

25  
26 The RAPID N-STEMI trial enrolled patients across 32 hospitals with on-site cardiac catheter  
27  
28 laboratories in the United Kingdom (UK). Potential participants who experienced symptoms  
29  
30 within 12 hours prior to admission were assessed on attendance to hospital and the research  
31  
32 team alerted if a diagnosis of N-STEMI was suspected. N-STEMI was defined as: 1) the  
33  
34 presence of cardiovascular symptoms suggestive of myocardial ischaemia and, 2) elevation in  
35  
36 high-sensitivity troponin (hs-Tn) I or T. Risk stratification using the GRACE 2.0 score was then  
37  
38 performed. Patients in whom the GRACE 2.0 score was  $\geq 118$ , or  $\geq 90$  with at least one  
39  
40 additional feature of high-risk presentation were deemed as higher risk. The full inclusion and  
41  
42 exclusion criteria are listed in **Table 2**.  
43  
44  
45  
46  
47  
48  
49  
50

51  
52 Patients were enrolled after obtaining verbal consent once eligibility was confirmed in the  
53  
54 Emergency Department or appropriate receiving unit. Participants were then randomised in  
55  
56 a 1:1 fashion to either: Group A) very early ICA with a view to revascularisation; or Group B)  
57  
58 standard of care timing of ICA with a view to revascularisation. Research team members had  
59  
60

1  
2  
3 6 hours from hospital admission to randomise verbally consented patients who met all  
4  
5 eligibility criteria (**Figure 1**).  
6  
7  
8  
9

### 10 **Study procedures**

11  
12 Randomisation was performed via either a secure centralised web-based or telephone  
13 assisted system provided by <http://www.sealedenvelope.com>. Those assigned to very early  
14  
15 angiography were transferred to the cardiac catheter laboratory as soon as possible. Teams  
16  
17 were encouraged, but not mandated to achieve a randomisation to vascular sheath insertion  
18  
19 time of less than 90 minutes. Timing of standard of care ICA was according to typical practice  
20  
21 at individual UK centres but encouraged to be within 72 hours of admission. Percutaneous  
22  
23 coronary intervention (PCI) and coronary artery bypass grafting (CABG) were performed  
24  
25 according to current international guidelines (20). Requirement for multi-vessel  
26  
27 revascularisation to a non-infarct related artery was at the individual operator's discretion.  
28  
29 Optimal medical therapy, including the use of anti-platelet agents, was in accordance with  
30  
31 current clinical guidelines (2). Drug eluting stents were used in all cases unless there were  
32  
33 clear contraindications. As this was a pragmatic strategy trial, all procedures performed were  
34  
35 part of guideline directed standard of care for N-STEMI.  
36  
37  
38  
39  
40  
41  
42  
43  
44  
45  
46

47 Patients were invited to provide verbal consent to participate in the study after being read an  
48  
49 abridged consent form prior to randomisation. This was to avoid delay in those participants  
50  
51 that were subsequently allocated to a very early invasive strategy. In addition to the baseline  
52  
53 hs-Tn required for study inclusion, samples were obtained post-angiography in both trial arms  
54  
55 and prior to angiography in the standard of care arm. EQ-5D-5L (21) and Seattle Angina  
56  
57 Questionnaires (22) to assess quality of life were completed after angiography in both arms.  
58  
59  
60

1  
2  
3 All patients were then asked to provide written informed consent for continuation in the  
4  
5 study prior to hospital discharge. Study follow up visits via telephone occurred at 30 days, 6  
6  
7 months, and 12 months from randomisation. Clinical event reporting, EQ-5D-5L and Seattle  
8  
9 Angina Questionnaire completion were performed at each of these timepoints.  
10  
11

### 12 13 **The GRACE 2.0 score**

14  
15 Previous high-risk subgroup analyses utilised the original GRACE score, with a score of >140  
16  
17 stratifying those patients at highest baseline risk. In the TIMACS and VERDICT trials it was  
18  
19 these groups that benefited from an early invasive strategy (9, 15). However, the updated  
20  
21 GRACE 2.0 score demonstrates equivalent performance and is easier to implement in clinical  
22  
23 practice as compared to the original GRACE Score (23). A notable advantage of GRACE 2.0 is  
24  
25 that Killip Class and serum creatinine values are not required for risk calculation. This allows  
26  
27 rapid stratification very early during hospital admission once a hs-Tn result is available, thus  
28  
29 obviating the need to wait for renal biochemistry results.  
30  
31  
32  
33  
34  
35  
36

37 Patients at intermediate risk (GRACE 2.0 score  $\geq 90$  to  $< 118$ ) were included to attenuate the  
38  
39 perceived age bias of the GRACE score, thereby allowing enrolment of younger patients  
40  
41 recognised to be at higher risk of future MACE. The following features: anterior ECG changes,  
42  
43 ST segment depression, diabetes mellitus on medication, and hs-Tn elevation three times the  
44  
45 upper limit of normal, have been demonstrated as determinants of poorer prognosis in N-  
46  
47 STEMI (24-26).  
48  
49  
50  
51

### 52 53 **RAPID N-STEMI CMR substudy**

54  
55 Imaging studies confined to N-STEMI are few and primarily descriptive, documenting smaller  
56  
57 infarct size than in STEMI (27). Novel cardiac magnetic resonance (CMR) markers (such as  
58  
59  
60

1  
2  
3 myocardial strain and salvage) may add incremental prognostic information to recognised  
4  
5 predictors such as left ventricular ejection fraction (LVEF) (28, 29).  
6  
7  
8  
9

10 The RAPID N-STEMI CMR substudy applied multi-parametric CMR imaging to; 1) assess the  
11  
12 impact of the timing of revascularisation on infarct size, volumes and LVEF, myocardial strain,  
13  
14 myocardial salvage, and extracellular volume and 2) quantify ischaemic burden post-PCI to  
15  
16 ascertain whether this can predict risk of future MACE. The RAPID N-STEMI CMR substudy  
17  
18 endpoints are listed in **Table 3**.  
19  
20  
21  
22  
23  
24

25 Four centres with an established record of high-quality CMR research participated in the  
26  
27 substudy. As myocardial injury and infarct size reduces early following MI (30), timing of CMR  
28  
29 was standardised and performed at 7 (+/-3) days post admission. This also ensured  
30  
31 angiography +/- PCI had been undertaken in both groups, as PCI itself may be associated with  
32  
33 further myocardial injury (31, 32). The protocol included cine imaging in long and short axes.  
34  
35 Adenosine stress perfusion was performed to assess for residual ischaemic burden and a  
36  
37 gadolinium-based contrast agent administered to allow detection of myocardial necrosis and  
38  
39 microvascular obstruction (32). Where available, pre- and post-contrast T1 mapping  
40  
41 sequences will facilitate estimation of extracellular volume that may indicate more subtle  
42  
43 changes in myocardial architecture (33).  
44  
45  
46  
47  
48  
49  
50  
51

52 All CMR images will be sent to the core laboratory at the National Institute for Health  
53  
54 Research Biomedical Research Centre in Leicester for quality control and central analysis, with  
55  
56 the interpreting clinicians blinded to patient information and allocated group.  
57  
58  
59  
60

## Study endpoints

The RAPID-NSTEMI trial will evaluate the effect of a very early invasive strategy on the binary primary endpoint which is composite of all-cause mortality, non-fatal MI, and admission for heart failure (HF) at 12 months following randomisation. The primary and secondary endpoints are listed in **Table 4**.

## Sample size calculation

RAPID N-STEMI is a superiority trial powered to detect a 25% risk reduction in the primary endpoint. With a two-sided test of  $\alpha=0.05$  and 80% power, 964 patients were required in each arm of the study. Assuming up to 5% withdrawal, 5% crossover and 8% requiring coronary artery bypass grafting, 1157 patients were planned to be recruited to each group, resulting in a recruitment target of 2314.

Sample size calculations were based primarily on the subgroup analysis of GRACE >140 high-risk patients in the TIMACS study. The composite endpoint of death, non-fatal MI, and stroke at 6 months occurred in 21.0% of patients in the standard care arm (9). We decided to include admission with HF since there is evidence of this being an important outcome following N-STEMI hospitalisation. Data from *Kaul et al* show that at 12 months following N-STEMI the incidence of admission with HF was 14.8% (34). Based on these data and use of the GRACE 2.0 score, the standard care arm composite event rate of all-cause mortality, non-fatal MI, and admission for HF in RAPID N-STEMI was estimated to be 19% at 12 months.

1  
2  
3 The CMR substudy is an exploratory mechanistic substudy that had a recruitment target of  
4  
5 200 patients. No formal power calculations were undertaken.  
6  
7  
8  
9

### 10 **Statistical analysis**

11  
12 A full statistical analysis plan will be completed prior to any analyses being undertaken.  
13  
14 Primary analysis will be carried out by intention to treat with imputation for individuals with  
15  
16 missing data due to loss to follow-up assessment as having no event. The primary outcome is  
17  
18 binary for each individual (yes or no) and therefore participants experiencing more than one  
19  
20 of the composite events will only be counted once. The treatment arms will be compared  
21  
22 using mixed effects logistic regression, which will be adjusted for randomisation stratification  
23  
24 factors hospital site (as a random effect) and GRACE score (as a fixed effect). Treatment  
25  
26 comparison estimates will be presented as adjusted odds ratios (OR) and 95% confidence  
27  
28 intervals (95% CI).  
29  
30  
31  
32  
33  
34  
35  
36  
37  
38  
39  
40  
41  
42  
43  
44  
45  
46  
47  
48  
49  
50  
51  
52  
53  
54  
55  
56  
57  
58  
59  
60

The analysis of binary secondary outcomes will be carried out in the intention to treat population as per the primary outcome analysis. All other secondary continuous outcomes will be analysed on a complete case approach, where participants will only be included if relevant data are available.

Quality of life data (EQ-5D) will be analysed using a mixed effects model with patient as a random effect to account for repeated measures over time. Each patient will contribute up to four postoperative repeated measures to the model. The model will be adjusted for the stratification variables as above. It is expected that some values at later time points will be

1  
2  
3 missing. The mixed effects model specified here will include these patients with partially  
4  
5 observed data.  
6  
7  
8  
9

### 10 *Subgroup analyses*

11  
12 An exploratory analysis of the primary outcome in line with the primary analysis plan will be  
13  
14 repeated looking for indications of a randomised treatment arm interaction with the  
15  
16 following subgroups:  
17  
18

19  
20 Gender; Female and Male  
21

22  
23 Age at randomisation: <75 years and ≥75 years  
24

25  
26 GRACE 2.0 score at admission; >140; >118 & <140; and 90-118  
27

28  
29 ECG normal vs ECG abnormalities at admission  
30  
31

### 32 *Exploratory analyses*

33  
34 The primary endpoint will also be analysed as a time-to-first-event outcome. The time will be  
35  
36 measured from randomisation and differences between treatment arms compared using  
37  
38 Cox's proportional hazards models, with treatment comparisons presented as hazard ratios  
39  
40 and 95% confidence interval. All time to event outcomes will be intention to treat with losses  
41  
42 to follow-up censored at date last seen.  
43  
44  
45  
46  
47  
48

49  
50 An exploratory analysis will be conducted repeating the analysis methods of the primary  
51  
52 outcome in the efficacy population. The efficacy population excludes individuals that were  
53  
54 randomised to Early Intervention not receiving angiography within 12 hours of randomisation  
55  
56 OR were randomised to Standard Care receiving angiography within 12 hours (unless  
57  
58 participant's procedure performed earlier than anticipated due to clinical deterioration).  
59  
60



1  
2  
3  
4  
5  
6 The association between CMR outcomes and the primary outcome will be assessed by logistic  
7  
8 regression with each CMR variable being included in a separate model. Models will have the  
9  
10 clinical outcome as their dependant variable and include the CMR variable as explanatory  
11  
12 variable as well as adjusting for treatment arm, site, GRACE score, age and sex.  
13  
14  
15  
16  
17  
18  
19

### 20 **Funding and sponsor**

21  
22  
23 RAPID N-STEMI is funded by the British Heart Foundation (grant number: CS/17/1/32445).  
24  
25 The study sponsor is University Hospitals of Leicester National Health Service (NHS) Trust. The  
26  
27 study is registered at ClinicalTrials.gov (NCT03707314).  
28  
29  
30  
31

### 32 **Ethics and dissemination**

33  
34  
35 The study is conducted in accordance with the principles of the 1996 Helsinki Declarations,  
36  
37 International Conference on Harmonisation-Good Clinical Practice (ICH-GCP) guidelines. The  
38  
39 trial has been reviewed and approved by the East of England Cambridge East Research Ethics  
40  
41 Committee (18/EE/0222). It is anticipated that data completion will be completed by the end  
42  
43 of December 2021, and the study results will be submitted for publication within 6 months of  
44  
45 completion.  
46  
47  
48

### 49 **Public and patient involvement**

50  
51  
52 The study was presented to the National Institute for Health Research (NIHR) University of  
53  
54 Leicester Biomedical Research Centre (BRC) Patient & Public Involvement Group.  
55  
56  
57 Development of the protocol, outcome measures, recruitment to the trial and conduct of  
58  
59 the study were discussed. There was a favourable response to the proposed study from the  
60

1  
2  
3 group. Study progress has been fed back to the Patient & Public Involvement group during  
4  
5 the course of the trial. Participants are given a study newsletter when they attend their 12-  
6  
7 month clinic visit providing information about the study timelines and when the study  
8  
9 results will be known. Access to the findings of the study will be made available in a  
10  
11 contemporary and user-friendly way and full details of the results provided if the patient  
12  
13 requests them.  
14  
15  
16  
17  
18  
19

### 20 **Trial coordination**

21  
22 Trial coordination is provided by the Leicester Clinical Trials Unit (LCTU) in collaboration with  
23  
24 the Chief Investigator (CI) and the Trial Management Group. LCTU is responsible for overall  
25  
26 trial conduct including data management, quality assurance and statistical reporting. LCTU  
27  
28 undertook site initiation visits, database training, and ensures all aspects of the trial are  
29  
30 performed to the highest ethical and research standards. The study is overseen by a Trial  
31  
32 Steering Committee consisting of three experienced clinicians and the CI. An independent  
33  
34 Data and Safety Monitoring Board convened to provide independent advice on study conduct  
35  
36 and safety issues. Clinical events will be adjudicated by an independent Clinical Events  
37  
38 Committee.  
39  
40  
41  
42  
43  
44  
45  
46

### 47 **Trial progress and impact of the COVID-19 pandemic**

48  
49 In March 2020, non-COVID-19 clinical research in the UK was suspended as NHS staff and  
50  
51 resources were repurposed to frontline services in preparation for the volume of COVID-19  
52  
53 patients expected to place severe pressure on the NHS (35). During this time, admissions with  
54  
55 N-STEMI declined substantially (36, 37). Following the first wave in the UK, RAPID N-STEMI  
56  
57 restarted in late July 2020 at a limited number of sites that had sufficient resource to  
58  
59  
60

1  
2  
3 recommence recruitment. However, due to the impending second wave of the COVID-19  
4  
5 pandemic the trial was once again suspended in December 2020. Discussions with the  
6  
7 funding body took place regarding the strategy for a successful restart, with it agreed an  
8  
9 interim pooled event rate (blinded to group allocation) should be calculated. Lower than  
10  
11 anticipated event rates were documented and it was agreed with the funder that enrolment  
12  
13 should be discontinued for two reasons: 1) the effect of the pandemic on clinical services and  
14  
15 2) the rate of the primary outcome. In summary, 425 (18.4% intended) patients were enrolled  
16  
17 to the main trial, with 61 of these participants included in the CMR substudy. The intention is  
18  
19 to perform in depth analyses of the available data from these populations and present these  
20  
21 in the near future.  
22  
23  
24  
25  
26  
27  
28  
29

### 30 **Discussion**

31  
32 The optimal timing of revascularisation in higher-risk N-STEMI is a controversial topic, not  
33  
34 least because international guidelines that mandate an early (<24 hr) invasive strategy are  
35  
36 not supported by prospective randomised-controlled clinical trial data (2, 3). RAPID N-STEMI  
37  
38 addresses this knowledge gap. However, like many other clinical trials during the COVID-19  
39  
40 pandemic, RAPID N-STEMI was discontinued due to the emergency restructuring of  
41  
42 healthcare and clinical research services. Despite falling short of the recruitment target,  
43  
44 RAPID N-STEMI has randomised 425 GRACE score defined higher-risk patients admitted with  
45  
46 N-STEMI, making it the third largest study to specifically investigate this important patient  
47  
48 population. It will therefore provide an significant contribution to the current evidence base,  
49  
50 with dissemination of results planned for 2022.  
51  
52  
53  
54  
55  
56  
57  
58

### 59 **COVID-19: implications for cardiovascular research**

1  
2  
3 The major challenges faced due to COVID-19 were three-fold. First, significant reductions in  
4 admissions with acute coronary syndrome and HF occurred during the pandemic in the UK,  
5  
6 with decreases of over to 40% in both disease entities, presumably due to fear of contagion  
7  
8 in healthcare settings (36, 38, 39). Not only did this reduce potential research participants,  
9  
10 but such declines in admissions become a critical issue for clinical trial event reporting and  
11  
12 thus may be a contributory factor to the lower event rates observed in RAPID N-STEMI.  
13  
14  
15  
16  
17  
18  
19

20 Second, the NHS underwent the largest workforce redeployment since its inception to  
21  
22 support severely pressurised frontline services treat the vast numbers of COVID-19 patients  
23  
24 attending UK hospitals. Research staff were moved to such clinical areas, resulting in all non-  
25  
26 COVID-19 related research being left severely disrupted and placed on hiatus until further  
27  
28 notice (40), the ramifications of which are sure to be felt long after the initial effects of the  
29  
30 COVID-19 pandemic have abated (41).  
31  
32  
33  
34  
35  
36  
37

38 Third, and perhaps most fundamentally for RAPID N-STEMI, elective cardiology activity across  
39  
40 the UK was effectively cancelled from the beginning of the first wave in March 2020 (35).  
41  
42 Suspension of planned cases created greater catheter laboratory capacity for acute MI  
43  
44 patients and dramatically reduced the standard of care timing to ICA for N-STEMI in the UK  
45  
46 (42). Such changes to catheter laboratory throughput and working patterns resulted in an  
47  
48 unmanageable task of ensuring adequate time separation between the very early ICA and  
49  
50 standard of care ICA arms in RAPID N-STEMI – essentially the control arm was accelerated.  
51  
52 Since any potential differences in clinical outcomes are related to the difference in timing  
53  
54 between the trial arms, new systems of care enforced by the COVID-19 pandemic left the  
55  
56  
57  
58  
59  
60

1  
2  
3 RAPID N-STEMI investigators in a position whereby restarting recruitment would inevitably  
4  
5 jeopardise the scientific validity of the trial.  
6  
7  
8  
9

### 10 **Very early revascularisation in higher-risk N-STEMI: will optimal timing ever be defined?**

11  
12 RAPID N-STEMI is the fifth randomised trial to investigate the timing of an invasive strategy in  
13  
14 GRACE score defined higher-risk N-STEMI patients, albeit the first to specifically investigate  
15  
16 this higher-risk population. Prior studies report pre-specified GRACE >140 subgroup analyses  
17  
18 (**Table 1**). Favourable results were observed in TIMACS and VERDICT (9, 15), while ELISA-3 and  
19  
20 RIDDLE N-STEMI showed signals of benefit although were limited by small sample sizes (12,  
21  
22 14). Since clinical event rates are greater in high-risk N-STEMI, it may be expected that an  
23  
24 adequately powered study to detect a clinically meaningful difference is achievable. Yet, in  
25  
26 recent years outcomes following N-STEMI have improved, largely due to enhanced  
27  
28 therapeutics and interventional techniques (43). Therefore, demonstration of superiority for  
29  
30 hard clinical endpoints from a very early invasive strategy may not be feasible in the  
31  
32 contemporary era because the logistics of delivering an appropriately powered trial may be  
33  
34 prohibitive.  
35  
36  
37  
38  
39  
40  
41  
42  
43  
44

45 The choice of trial endpoints is also of note. The EARLY trial indicated benefit from a very early  
46  
47 invasive approach in European Society of Cardiology defined high-risk patients (median  
48  
49 GRACE score 122), but such benefit was driven by the softer endpoint of recurrent ischaemic  
50  
51 events in a cohort that did not receive P2Y12 inhibitor pre-treatment (17). One may question  
52  
53 the clinical relevance of an endpoint, and as such it was not included in the composite primary  
54  
55 endpoint of RAPID N-STEMI. Given that practice in many centres is now shifting to a strategy  
56  
57 of early ICA in higher-risk N-STEMI patient groups, and that this strategy is now widely  
58  
59  
60

1  
2  
3 accepted as without excess risk, it appears unlikely that the optimal timing of  
4  
5 revascularisation in higher-risk N-STEMI will ever be robustly defined.  
6  
7  
8  
9

### 10 **Contributorship statement**

11  
12 AsB, MF, CB, NC, ApB, GPM & AHG conceived the idea for the study. AsB, GPM & AHG  
13  
14 designed the study protocol. TAK drafted the manuscript. AsB, AL, MF, CPG, JPG, MD, RH, SB,  
15  
16 EP, CB, NC, ApB & GPM critically reviewed and approved the final version of the manuscript.  
17  
18  
19  
20  
21  
22

### 23 **Competing interests**

24  
25 CB is employed by the University of Glasgow which holds consultancy and research  
26  
27 agreements for his work with Abbott Vascular, AstraZeneca, Boehringer Ingelheim, Causeway  
28  
29 Therapeutics, Coroventis, Genentech, GSK, HeartFlow, Menarini, Neovasc, Siemens  
30  
31 Healthcare, and Valo Health. The other co-authors have no relevant disclosures.  
32  
33  
34  
35  
36  
37

### 38 **Funding**

39  
40 The study is funded by the British Heart Foundation (grant number: CS/17/1/32445). The  
41  
42 grant providers were not involved in study design, data acquisition or management, or  
43  
44 analysis and writing of final reports.  
45  
46  
47  
48  
49

### 50 **Acknowledgements**

51  
52 The authors would like to acknowledge the support of the National Institute for Health  
53  
54 Research Biomedical Research Centre in Leicester and the Leeds National Institute for Health  
55  
56 Research Clinical Research Facility.  
57  
58  
59  
60

## References

1. Fox KAA, Clayton TC, Damman P, Pocock SJ, de Winter RJ, Tijssen JGP, et al. Long-term outcome of a routine versus selective invasive strategy in patients with non-ST-segment elevation acute coronary syndrome a meta-analysis of individual patient data. *J Am Coll Cardiol.* 2010;55(22):2435-45.
2. Collet JP, Thiele H, Barbato E, Barthelémy O, Bauersachs J, Bhatt DL, et al. 2020 ESC Guidelines for the management of acute coronary syndromes in patients presenting without persistent ST-segment elevation. *Eur Heart J.* 2020.
3. Amsterdam EA, Wenger NK, Brindis RG, Casey DE, Jr., Ganiats TG, Holmes DR, Jr., et al. 2014 AHA/ACC Guideline for the Management of Patients with Non-ST-Elevation Acute Coronary Syndromes: a report of the American College of Cardiology/American Heart Association Task Force on Practice Guidelines. *J Am Coll Cardiol.* 2014;64(24):e139-e228.
4. Hall M, Bebb OJ, Dondo TB, Yan AT, Goodman SG, Bueno H, et al. Guideline-indicated treatments and diagnostics, GRACE risk score, and survival for non-ST elevation myocardial infarction. *Eur Heart J.* 2018;39(42):3798-806.
5. van 't Hof AW, de Vries ST, Dambrink JH, Miedema K, Suryapranata H, Hoorntje JC, et al. A comparison of two invasive strategies in patients with non-ST elevation acute coronary syndromes: results of the Early or Late Intervention in unStable Angina (ELISA) pilot study. 2b/3a upstream therapy and acute coronary syndromes. *Eur Heart J.* 2003;24(15):1401-5.
6. Neumann FJ, Kastrati A, Pogatsa-Murray G, Mehilli J, Bollwein H, Bestehorn HP, et al. Evaluation of prolonged antithrombotic pretreatment ("cooling-off" strategy) before intervention in patients with unstable coronary syndromes: a randomized controlled trial. *JAMA.* 2003;290(12):1593-9.
7. Montalescot G, Cayla G, Collet JP, Elhadad S, Beygui F, Le Breton H, et al. Immediate vs delayed intervention for acute coronary syndromes: a randomized clinical trial. *JAMA.* 2009;302(9):947-54.
8. Riezebos RK, Ronner E, Ter Bals E, Slagboom T, Smits PC, ten Berg JM, et al. Immediate versus deferred coronary angioplasty in non-ST-segment elevation acute coronary syndromes. *Heart.* 2009;95(10):807-12.
9. Mehta SR, Granger CB, Boden WE, Steg PG, Bassand JP, Faxon DP, et al. Early versus delayed invasive intervention in acute coronary syndromes. *N Engl J Med.* 2009;360(21):2165-75.
10. Sciahbasi A, Madonna M, De Vita M, Agati L, Scioli R, Summaria F, et al. Comparison of immediate vs early invasive strategy in patients with first acute non-ST-elevation myocardial infarction. *Clin Cardiol.* 2010;33(10):650-5.
11. Thiele H, Rach J, Klein N, Pfeiffer D, Hartmann A, Hambrecht R, et al. Optimal timing of invasive angiography in stable non-ST-elevation myocardial infarction: the Leipzig Immediate versus early and late Percutaneous coronary Intervention trial in NSTEMI (LIPSIA-NSTEMI Trial). *Eur Heart J.* 2012;33(16):2035-43.
12. Badings EA, The SH, Dambrink JH, van Wijngaarden J, Tjeerdsma G, Rasoul S, et al. Early or late intervention in high-risk non-ST-elevation acute coronary syndromes: results of the ELISA-3 trial. *EuroIntervention.* 2013;9(1):54-61.
13. Reuter PG, Rouchy C, Cattan S, Benamer H, Jullien T, Beruben A, et al. Early invasive strategy in high-risk acute coronary syndrome without ST-segment elevation. The Sisca randomized trial. *Int J Cardiol.* 2015;182:414-8.

14. Milosevic A, Vasiljevic-Pokrajcic Z, Milasinovic D, Marinkovic J, Vukcevic V, Stefanovic B, et al. Immediate Versus Delayed Invasive Intervention for Non-STEMI Patients: The RIDDLE-NSTEMI Study. *JACC Cardiovasc Interv.* 2016;9(6):541-9.
15. Kofoed KF, Kelbaek H, Hansen PR, Torp-Pedersen C, Hofsten D, Klovgaard L, et al. Early Versus Standard Care Invasive Examination and Treatment of Patients With Non-ST-Segment Elevation Acute Coronary Syndrome. *Circulation.* 2018;138(24):2741-50.
16. Rasmussen MB, Stengaard C, Sorensen JT, Riddervold IS, Sondergaard HM, Niemann T, et al. Comparison of Acute Versus Subacute Coronary Angiography in Patients With NON-ST-Elevation Myocardial Infarction (from the NONSTEMI Trial). *Am J Cardiol.* 2019;124(6):825-32.
17. Lemesle G, Laine M, Pankert M, Boueri Z, Motreff P, Paganelli F, et al. Optimal Timing of Intervention in NSTEMI-ACS Without Pre-Treatment: The EARLY Randomized Trial. *JACC Cardiovasc Interv.* 2020;13(8):907-17.
18. Fagel ND, Amoroso G, Vink MA, Slagboom T, van der Schaaf RJ, Herrman JP, et al. An immediate or early invasive strategy in non-ST-elevation acute coronary syndrome: The OPTIMA-2 randomized controlled trial. *Am Heart J.* 2021;234:42-50.
19. Jobs A, Mehta SR, Montalescot G, Vicaut E, Van't Hof AWJ, Badings EA, et al. Optimal timing of an invasive strategy in patients with non-ST-elevation acute coronary syndrome: a meta-analysis of randomised trials. *Lancet.* 2017;390(10096):737-46.
20. Neumann FJ, Sousa-Uva M, Ahlsson A, Alfonso F, Banning AP, Benedetto U, et al. 2018 ESC/EACTS Guidelines on myocardial revascularization. *Eur Heart J.* 2019;40(2):87-165.
21. Herdman M, Gudex C, Lloyd A, Janssen M, Kind P, Parkin D, et al. Development and preliminary testing of the new five-level version of EQ-5D (EQ-5D-5L). *Qual Life Res.* 2011;20(10):1727-36.
22. Spertus JA, Winder JA, Dewhurst TA, Deyo RA, Prodzinski J, McDonnell M, et al. Development and evaluation of the Seattle Angina Questionnaire: a new functional status measure for coronary artery disease. *J Am Coll Cardiol.* 1995;25(2):333-41.
23. Fox KA, Fitzgerald G, Puymirat E, Huang W, Carruthers K, Simon T, et al. Should patients with acute coronary disease be stratified for management according to their risk? Derivation, external validation and outcomes using the updated GRACE risk score. *BMJ Open.* 2014;4(2):e004425.
24. Stone PH, Raabe DS, Jaffe AS, Gustafson N, Muller JE, Turi ZG, et al. Prognostic significance of location and type of myocardial infarction: independent adverse outcome associated with anterior location. *J Am Coll Cardiol.* 1988;11(3):453-63.
25. Mak KH, Topol EJ. Emerging concepts in the management of acute myocardial infarction in patients with diabetes mellitus. *J Am Coll Cardiol.* 2000;35(3):563-8.
26. Bagai A, Huang Z, Likhnygina Y, Harrington RA, Armstrong PW, Strony J, et al. Magnitude of troponin elevation and long-term clinical outcomes in acute coronary syndrome patients treated with and without revascularization. *Circ Cardiovasc Interv.* 2015;8(6):e002314.
27. Plein S, Younger JF, Sparrow P, Ridgway JP, Ball SG, Greenwood JP. Cardiovascular magnetic resonance of scar and ischemia burden early after acute ST elevation and non-ST elevation myocardial infarction. *J Cardiovasc Magn Reson.* 2008;10:47.
28. Eitel I, Stiermaier T, Lange T, Rommel KP, Koschalka A, Kowallick JT, et al. Cardiac Magnetic Resonance Myocardial Feature Tracking for Optimized Prediction of Cardiovascular Events Following Myocardial Infarction. *JACC Cardiovasc Imaging.* 2018;11(10):1433-44.



- 1
- 2
- 3
- 4 29. Eitel I, Desch S, Fuernau G, Hildebrand L, Gutberlet M, Schuler G, et al. Prognostic
- 5 significance and determinants of myocardial salvage assessed by cardiovascular magnetic
- 6 resonance in acute reperfused myocardial infarction. *J Am Coll Cardiol.* 2010;55(22):2470-9.
- 7 30. Mather AN, Fairbairn TA, Artis NJ, Greenwood JP. Timing of Cardiovascular MR
- 8 Imaging after Acute Myocardial Infarction : Effect on Estimates of Infarct Characteristics and
- 9 Prediction of Late Ventricular Remodeling. *Radiology.* 2011;261:116-26.
- 10 31. Selvanayagam JB, Porto I, Channon K, Petersen SE, Francis JM, Neubauer S, et al.
- 11 Troponin elevation after percutaneous coronary intervention directly represents the extent
- 12 of irreversible myocardial injury: insights from cardiovascular magnetic resonance imaging.
- 13 *Circulation.* 2005;111(8):1027-32.
- 14 32. McCann GP, Khan JN, Greenwood JP, Nazir S, Dalby M, Curzen N, et al. Complete
- 15 Versus Lesion-Only Primary PCI: The Randomized Cardiovascular MR CvLPRIT Substudy. *J Am*
- 16 *Coll Cardiol.* 2015;66(24):2713-24.
- 17 33. Singh A, Greenwood JP, Berry C, Dawson DK, Hogrefe K, Kelly DJ, et al. Comparison of
- 18 exercise testing and CMR measured myocardial perfusion reserve for predicting outcome in
- 19 asymptomatic aortic stenosis: the PRognostic Importance of MIcrovascular Dysfunction in
- 20 Aortic Stenosis (PRIMID AS) Study. *Eur Heart J.* 2017;38(16):1222-9.
- 21 34. Kaul P, Ezekowitz JA, Armstrong PW, Leung BK, Savu A, Welsh RC, et al. Incidence of
- 22 heart failure and mortality after acute coronary syndromes. *Am Heart J.* 2013;165(3):385.e2.
- 23 35. NHS England. Next steps on NHS response to COVID-19: Letter from Sir Simon Stevens
- 24 and Amanda Pritchard 2020 [Available from: [https://www.england.nhs.uk/coronavirus/wp-](https://www.england.nhs.uk/coronavirus/wp-content/uploads/sites/52/2020/03/20200317-NHS-COVID-letter-FINAL.pdf)
- 25 [content/uploads/sites/52/2020/03/20200317-NHS-COVID-letter-FINAL.pdf](https://www.england.nhs.uk/coronavirus/wp-content/uploads/sites/52/2020/03/20200317-NHS-COVID-letter-FINAL.pdf)].
- 26 36. Mafham MM, Spata E, Goldacre R, Gair D, Curnow P, Bray M, et al. COVID-19 pandemic
- 27 and admission rates for and management of acute coronary syndromes in England. *Lancet.*
- 28 2020.
- 29 37. Wu J, Mamas M, Rashid M, Weston C, Hains J, Luescher T, et al. Patient response,
- 30 treatments and mortality for acute myocardial infarction during the COVID-19 pandemic. *Eur*
- 31 *Heart J Qual Care Clin Outcomes.* 2020.
- 32 38. Shoaib A, Van Spall HGC, Wu J, Cleland JGF, McDonagh TA, Rashid M, et al. Substantial
- 33 decline in hospital admissions for heart failure accompanied by increased community
- 34 mortality during COVID-19 pandemic. *Eur Heart J Qual Care Clin Outcomes.* 2021.
- 35 39. Wu J, Mamas MA, de Belder MA, Deanfield JE, Gale CP. Second Decline in Admissions
- 36 With Heart Failure and Myocardial Infarction During the COVID-19 Pandemic. *J Am Coll*
- 37 *Cardiol.* 2021;77(8):1141-3.
- 38 40. National Institute for Health Research. DHSC issues guidance on the impact of COVID-
- 39 19 on research funded or supported by NIHR, updated 19 Mar 2020 [Available from:
- 40 [https://www.nihr.ac.uk/news/dhsc-issues-guidance-on-the-impact-on-covid-19-on-](https://www.nihr.ac.uk/news/dhsc-issues-guidance-on-the-impact-on-covid-19-on-research-funded-or-supported-by-nihr/24469)
- 41 [research-funded-or-supported-by-nihr/24469](https://www.nihr.ac.uk/news/dhsc-issues-guidance-on-the-impact-on-covid-19-on-research-funded-or-supported-by-nihr/24469)].
- 42 41. van Dorn A. COVID-19 and readjusting clinical trials. *Lancet.* 2020;396(10250):523-4.
- 43 42. Kwok CS, Gale CP, Curzen N, de Belder MA, Ludman P, Luscher TF, et al. Impact of the
- 44 COVID-19 Pandemic on Percutaneous Coronary Intervention in England: Insights From the
- 45 British Cardiovascular Intervention Society PCI Database Cohort. *Circ Cardiovasc Interv.*
- 46 2020;13(11):e009654.
- 47 43. Hall M, Dondo TB, Yan AT, Goodman SG, Bueno H, Chew DP, et al. Association of
- 48 Clinical Factors and Therapeutic Strategies With Improvements in Survival Following Non-ST-
- 49 Elevation Myocardial Infarction, 2003-2013. *JAMA.* 2016;316(10):1073-82.
- 50
- 51
- 52
- 53
- 54
- 55
- 56
- 57
- 58
- 59
- 60

1  
2  
3 **Figure Legends**  
4  
5

6 **Figure 1: RAPID N-STEMI study flow diagram**  
7  
8

9 CMR: cardiac magnetic resonance; ECG: electrocardiogram; hs-Tn: high sensitivity troponin N-STEMI: non-ST  
10 elevation myocardial infarction; OMT: optimal medical therapy; SAQ: Seattle Angina Questionnaire; STEMI: ST  
11 elevation myocardial infarction; ULN: upper limit of normal  
12  
13  
14  
15  
16  
17  
18  
19  
20  
21  
22  
23  
24  
25  
26  
27  
28  
29  
30  
31  
32  
33  
34  
35  
36  
37  
38  
39  
40  
41  
42  
43  
44  
45  
46  
47  
48  
49  
50  
51  
52  
53  
54  
55  
56  
57  
58  
59  
60

For peer review only

**Table 1: Higher-risk N-STEMI (GRACE score >140) subgroup analyses from randomised studies comparing early and delayed invasive strategies**

| Trial              | Patients | Time to ICA: early (median & IQR, h) | Time to ICA: delayed (median & IQR, h) | Primary outcome                                                                            | Results                                                                     |
|--------------------|----------|--------------------------------------|----------------------------------------|--------------------------------------------------------------------------------------------|-----------------------------------------------------------------------------|
| TIMACS 2009        | 961      | 14.0 (3.0 – 21.0)                    | 50.0 (41.0 – 81.0)                     | 6-month death, non-fatal MI, stroke                                                        | Early = 13.9%<br>Delayed = 21.0%<br>HR 0.65, 95% CI 0.48-0.89,<br>p = 0.006 |
| ELISA-3 2013       | 224      | 2.6 (1.2 – 6.2)                      | 54.9 (44.2 – 74.5)                     | 30-day death, non-fatal MI, recurrent ischaemia                                            | Early = 10.5%<br>Delayed = 19.1%<br>HR 0.55, 95% CI 0.29-1.10,<br>p=0.26    |
| RIDDLE-NSTEMI 2016 | 123      | 1.4 (1.0 – 2.2)                      | 61.0 (35.8 – 85.0)                     | 30-day death, non-fatal MI                                                                 | Early = 10.7%<br>Delayed = 17.9%<br>HR 0.56, 95% CI 0.21-1.51<br>p=0.12     |
| VERDICT 2018       | 1025     | 4.7 (3.0 – 12.2)                     | 61.6 (39.4 – 87.8)                     | Death, non-fatal MI, refractory ischaemia, admission for heart failure at median 4.3 years | Early = 34.0%<br>Delayed = 40.1%<br>HR 0.81, 95% CI 0.66-0.99,<br>p = 0.023 |

CI: confidence interval; HR: hazard ratio; ICA: invasive coronary angiography; IQR: interquartile range; MI: myocardial infarction

**Table 2: RAPID N-STEMI inclusion and exclusion criteria**

| Inclusion criteria                                                                                                                                                                                                                                                                                                                                                                                     | Exclusion criteria                                                                                               |
|--------------------------------------------------------------------------------------------------------------------------------------------------------------------------------------------------------------------------------------------------------------------------------------------------------------------------------------------------------------------------------------------------------|------------------------------------------------------------------------------------------------------------------|
| >18 years of age                                                                                                                                                                                                                                                                                                                                                                                       | ST elevation myocardial infarction                                                                               |
| Clinical diagnosis of N-STEMI comprising: <ul style="list-style-type: none"> <li>▪ Cardiovascular symptoms suggestive of myocardial ischaemia</li> <li>▪ Elevated high-sensitivity troponin I or T</li> </ul>                                                                                                                                                                                          | Evident type 2 myocardial infarction                                                                             |
| Symptoms <12 hours prior to admission                                                                                                                                                                                                                                                                                                                                                                  | Previous known cardiomyopathy                                                                                    |
| GRACE 2.0 score $\geq 118$ or if GRACE 2.0 score $\geq 90$ but $< 118$ must have at least one high-risk feature: <ul style="list-style-type: none"> <li>▪ Anterior location of ECG changes (V2-V5)</li> <li>▪ ST segment depression in 2 contiguous leads of 0.15mV/1.5mm</li> <li>▪ Diabetes mellitus on medication</li> <li>▪ Elevated high-sensitivity troponin 3x upper limit of normal</li> </ul> | Need for urgent PCI according to ESC Guidelines (haemodynamic instability, VT, VF, recurrent or persistent pain) |
| Intention to perform angiography and, if indicated, follow-on revascularisation                                                                                                                                                                                                                                                                                                                        | Cardiogenic shock                                                                                                |
| Provision of verbal assent followed by written informed consent                                                                                                                                                                                                                                                                                                                                        | Severe valvular heart disease                                                                                    |
|                                                                                                                                                                                                                                                                                                                                                                                                        | Any contraindication to PCI                                                                                      |
|                                                                                                                                                                                                                                                                                                                                                                                                        | Current participation in another intervention trial                                                              |

ECG: electrocardiogram; ESC: European Society of Cardiology; GRACE: Global Registry of Acute Coronary Events; N-STEMI: non-ST elevation myocardial infarction; PCI: percutaneous coronary intervention; VF: ventricular fibrillation; VT: ventricular tachycardia

**Table 3: RAPID N-STEMI CMR study endpoints**

| Primary outcome                        | Secondary outcomes                             |
|----------------------------------------|------------------------------------------------|
| Infarct size (% left ventricular mass) | Left ventricular volumes and ejection fraction |
|                                        | Myocardial salvage index                       |
|                                        | Extracellular volume                           |
|                                        | Ischaemic burden                               |
|                                        | Global myocardial strain                       |

**Table 4: RAPID N-STEMI study endpoints**

| Primary outcome                                                                                    | Secondary outcomes                                                         |
|----------------------------------------------------------------------------------------------------|----------------------------------------------------------------------------|
| All-cause mortality, non-fatal myocardial infarction, and admission for heart failure at 12 months | Individual components of primary composite outcome                         |
|                                                                                                    | Cardiovascular mortality                                                   |
|                                                                                                    | Ischaemia-driven revascularisation                                         |
|                                                                                                    | BARC 3-5 major bleeding                                                    |
|                                                                                                    | Stroke                                                                     |
|                                                                                                    | Length of inpatient stay                                                   |
|                                                                                                    | Admission for any cause                                                    |
|                                                                                                    | Events prior to angiography                                                |
|                                                                                                    | Quality of life (Seattle Angina Questionnaire and EQ-5D-5L questionnaires) |
|                                                                                                    | Cost-efficacy analysis                                                     |
|                                                                                                    | Proportion of patients requiring emergency revascularisation in group B    |
|                                                                                                    | Total VARC-2 classified access site complications                          |
| Major VARC-2 classified access site complications                                                  |                                                                            |

BARC: Bleeding Academic Research Consortium; VARC: Vascular Access Research Consortium

1  
2  
3  
4  
5  
6  
7  
8  
9  
10  
11  
12  
13  
14  
15  
16  
17  
18  
19  
20  
21  
22  
23  
24  
25  
26  
27  
28  
29  
30  
31  
32  
33  
34  
35  
36  
37  
38  
39  
40  
41  
42  
43  
44  
45  
46

For peer review only

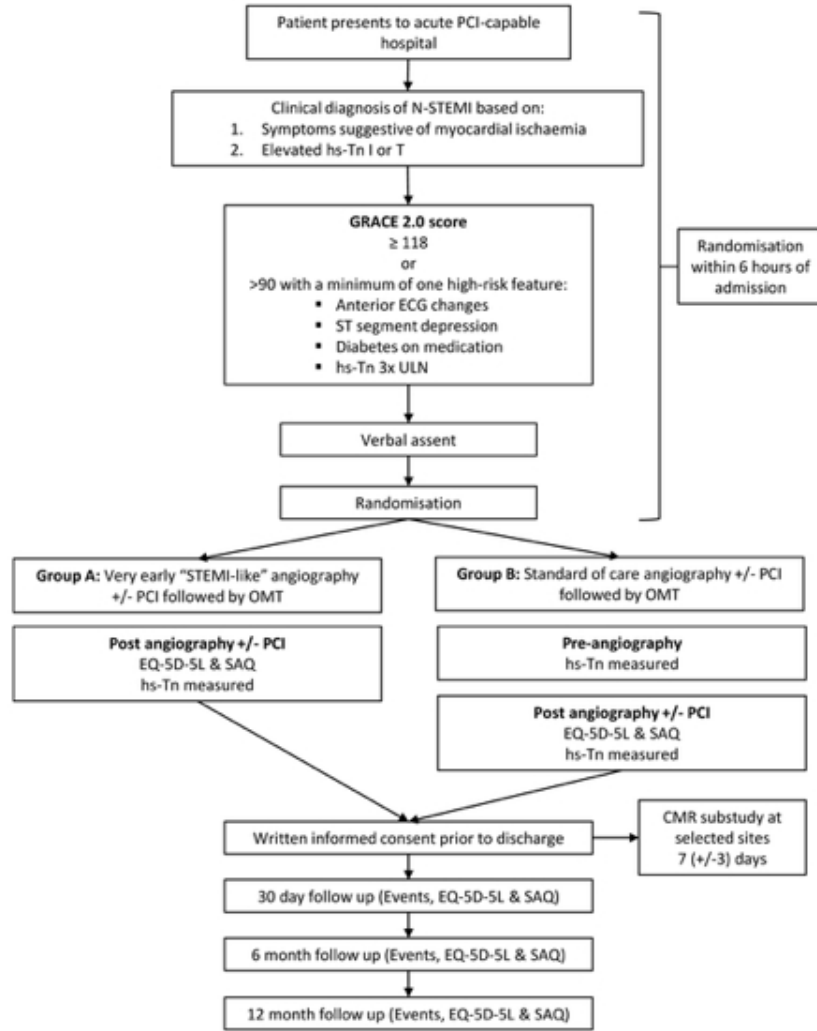

Figure 1: RAPID N-STEMI study flow diagram

CMR: cardiac magnetic resonance; ECG: electrocardiogram; hs-Tn: high sensitivity troponin N-STEMI: non-ST elevation myocardial infarction; OMT: optimal medical therapy; SAQ: Seattle Angina Questionnaire; STEMI: ST elevation myocardial infarction; ULN: upper limit of normal

38x54mm (300 x 300 DPI)



# Reporting checklist for protocol of a clinical trial.

Based on the SPIRIT guidelines.

## Instructions to authors

Complete this checklist by entering the page numbers from your manuscript where readers will find each of the items listed below.

Your article may not currently address all the items on the checklist. Please modify your text to include the missing information. If you are certain that an item does not apply, please write "n/a" and provide a short explanation.

Upload your completed checklist as an extra file when you submit to a journal.

In your methods section, say that you used the SPIRIT reporting guidelines, and cite them as:

Chan A-W, Tetzlaff JM, Gøtzsche PC, Altman DG, Mann H, Berlin J, Dickersin K, Hróbjartsson A, Schulz KF, Parulekar WR, Krleža-Jerić K, Laupacis A, Moher D. SPIRIT 2013 Explanation and Elaboration: Guidance for protocols of clinical trials. *BMJ*. 2013;346:e7586

|                                   |                                                                                                                                 | Page   |
|-----------------------------------|---------------------------------------------------------------------------------------------------------------------------------|--------|
|                                   | Reporting Item                                                                                                                  | Number |
| <b>Administrative information</b> |                                                                                                                                 |        |
| Title                             | <a href="#">#1</a> Descriptive title identifying the study design, population, interventions, and, if applicable, trial acronym | 1      |

|    |                     |                     |                                                            |    |
|----|---------------------|---------------------|------------------------------------------------------------|----|
| 1  | Trial registration  | <a href="#">#2a</a> | Trial identifier and registry name. If not yet registered, | 2  |
| 2  |                     |                     |                                                            |    |
| 3  |                     |                     |                                                            |    |
| 4  |                     |                     | name of intended registry                                  |    |
| 5  |                     |                     |                                                            |    |
| 6  | Trial registration: | <a href="#">#2b</a> | All items from the World Health Organization Trial         | 2  |
| 7  |                     |                     |                                                            |    |
| 8  | data set            |                     | Registration Data Set                                      |    |
| 9  |                     |                     |                                                            |    |
| 10 |                     |                     |                                                            |    |
| 11 | Protocol version    | <a href="#">#3</a>  | Date and version identifier                                | 3  |
| 12 |                     |                     |                                                            |    |
| 13 |                     |                     |                                                            |    |
| 14 |                     |                     |                                                            |    |
| 15 | Funding             | <a href="#">#4</a>  | Sources and types of financial, material, and other        | 20 |
| 16 |                     |                     |                                                            |    |
| 17 |                     |                     | support                                                    |    |
| 18 |                     |                     |                                                            |    |
| 19 |                     |                     |                                                            |    |
| 20 | Roles and           | <a href="#">#5a</a> | Names, affiliations, and roles of protocol contributors    | 20 |
| 21 |                     |                     |                                                            |    |
| 22 | responsibilities:   |                     |                                                            |    |
| 23 |                     |                     |                                                            |    |
| 24 | contributorship     |                     |                                                            |    |
| 25 |                     |                     |                                                            |    |
| 26 |                     |                     |                                                            |    |
| 27 |                     |                     |                                                            |    |
| 28 | Roles and           | <a href="#">#5b</a> | Name and contact information for the trial sponsor         | 8  |
| 29 |                     |                     |                                                            |    |
| 30 | responsibilities:   |                     |                                                            |    |
| 31 |                     |                     |                                                            |    |
| 32 | sponsor contact     |                     |                                                            |    |
| 33 |                     |                     |                                                            |    |
| 34 | information         |                     |                                                            |    |
| 35 |                     |                     |                                                            |    |
| 36 |                     |                     |                                                            |    |
| 37 |                     |                     |                                                            |    |
| 38 | Roles and           | <a href="#">#5c</a> | Role of study sponsor and funders, if any, in study        | 20 |
| 39 |                     |                     |                                                            |    |
| 40 | responsibilities:   |                     | design; collection, management, analysis, and              |    |
| 41 |                     |                     |                                                            |    |
| 42 | sponsor and funder  |                     | interpretation of data; writing of the report; and the     |    |
| 43 |                     |                     |                                                            |    |
| 44 |                     |                     | decision to submit the report for publication, including   |    |
| 45 |                     |                     |                                                            |    |
| 46 |                     |                     | whether they will have ultimate authority over any of      |    |
| 47 |                     |                     |                                                            |    |
| 48 |                     |                     | these activities                                           |    |
| 49 |                     |                     |                                                            |    |
| 50 |                     |                     |                                                            |    |
| 51 |                     |                     |                                                            |    |
| 52 | Roles and           | <a href="#">#5d</a> | Composition, roles, and responsibilities of the            | 11 |
| 53 |                     |                     |                                                            |    |
| 54 | responsibilities:   |                     | coordinating centre, steering committee, endpoint          |    |
| 55 |                     |                     |                                                            |    |
| 56 | committees          |                     | adjudication committee, data management team, and          |    |
| 57 |                     |                     |                                                            |    |
| 58 |                     |                     |                                                            |    |
| 59 |                     |                     |                                                            |    |
| 60 |                     |                     |                                                            |    |

other individuals or groups overseeing the trial, if applicable (see Item 21a for data monitoring committee)

## Introduction

|                                                  |                     |                                                                                                                                                                                                            |   |
|--------------------------------------------------|---------------------|------------------------------------------------------------------------------------------------------------------------------------------------------------------------------------------------------------|---|
| Background and rationale                         | <a href="#">#6a</a> | Description of research question and justification for undertaking the trial, including summary of relevant studies (published and unpublished) examining benefits and harms for each intervention         | 5 |
| Background and rationale: choice of comparators  | <a href="#">#6b</a> | Explanation for choice of comparators                                                                                                                                                                      | 5 |
| Objectives                                       | <a href="#">#7</a>  | Specific objectives or hypotheses                                                                                                                                                                          | 6 |
| Trial design                                     | <a href="#">#8</a>  | Description of trial design including type of trial (eg, parallel group, crossover, factorial, single group), allocation ratio, and framework (eg, superiority, equivalence, non-inferiority, exploratory) | 6 |
| <b>Methods:</b>                                  |                     |                                                                                                                                                                                                            |   |
| <b>Participants, interventions, and outcomes</b> |                     |                                                                                                                                                                                                            |   |
| Study setting                                    | <a href="#">#9</a>  | Description of study settings (eg, community clinic, academic hospital) and list of countries where data will be collected. Reference to where list of study sites can be obtained                         | 6 |

|    |                      |                      |                                                              |    |
|----|----------------------|----------------------|--------------------------------------------------------------|----|
| 1  | Eligibility criteria | <a href="#">#10</a>  | Inclusion and exclusion criteria for participants. If        | 7  |
| 2  |                      |                      |                                                              |    |
| 3  |                      |                      | applicable, eligibility criteria for study centres and       |    |
| 4  |                      |                      |                                                              |    |
| 5  |                      |                      | individuals who will perform the interventions (eg,          |    |
| 6  |                      |                      |                                                              |    |
| 7  |                      |                      | surgeons, psychotherapists)                                  |    |
| 8  |                      |                      |                                                              |    |
| 9  |                      |                      |                                                              |    |
| 10 |                      |                      |                                                              |    |
| 11 | Interventions:       | <a href="#">#11a</a> | Interventions for each group with sufficient detail to allow | 7  |
| 12 |                      |                      |                                                              |    |
| 13 | description          |                      | replication, including how and when they will be             |    |
| 14 |                      |                      |                                                              |    |
| 15 |                      |                      | administered                                                 |    |
| 16 |                      |                      |                                                              |    |
| 17 |                      |                      |                                                              |    |
| 18 |                      |                      |                                                              |    |
| 19 | Interventions:       | <a href="#">#11b</a> | Criteria for discontinuing or modifying allocated            | 7  |
| 20 |                      |                      |                                                              |    |
| 21 | modifications        |                      | interventions for a given trial participant (eg, drug dose   |    |
| 22 |                      |                      |                                                              |    |
| 23 |                      |                      | change in response to harms, participant request, or         |    |
| 24 |                      |                      |                                                              |    |
| 25 |                      |                      | improving / worsening disease)                               |    |
| 26 |                      |                      |                                                              |    |
| 27 |                      |                      |                                                              |    |
| 28 |                      |                      |                                                              |    |
| 29 | Interventions:       | <a href="#">#11c</a> | Strategies to improve adherence to intervention protocols,   | 7  |
| 30 |                      |                      |                                                              |    |
| 31 | adherence            |                      | and any procedures for monitoring adherence (eg, drug        |    |
| 32 |                      |                      |                                                              |    |
| 33 |                      |                      | tablet return; laboratory tests)                             |    |
| 34 |                      |                      |                                                              |    |
| 35 |                      |                      |                                                              |    |
| 36 | Interventions:       | <a href="#">#11d</a> | Relevant concomitant care and interventions that are         | 7  |
| 37 |                      |                      |                                                              |    |
| 38 | concomitant care     |                      | permitted or prohibited during the trial                     |    |
| 39 |                      |                      |                                                              |    |
| 40 |                      |                      |                                                              |    |
| 41 |                      |                      |                                                              |    |
| 42 | Outcomes             | <a href="#">#12</a>  | Primary, secondary, and other outcomes, including the        | 10 |
| 43 |                      |                      |                                                              |    |
| 44 |                      |                      | specific measurement variable (eg, systolic blood            |    |
| 45 |                      |                      |                                                              |    |
| 46 |                      |                      | pressure), analysis metric (eg, change from baseline, final  |    |
| 47 |                      |                      |                                                              |    |
| 48 |                      |                      | value, time to event), method of aggregation (eg, median,    |    |
| 49 |                      |                      |                                                              |    |
| 50 |                      |                      | proportion), and time point for each outcome. Explanation    |    |
| 51 |                      |                      |                                                              |    |
| 52 |                      |                      | of the clinical relevance of chosen efficacy and harm        |    |
| 53 |                      |                      |                                                              |    |
| 54 |                      |                      | outcomes is strongly recommended                             |    |
| 55 |                      |                      |                                                              |    |
| 56 |                      |                      |                                                              |    |
| 57 |                      |                      |                                                              |    |
| 58 |                      |                      |                                                              |    |
| 59 |                      |                      |                                                              |    |
| 60 |                      |                      |                                                              |    |

|    |                           |                      |                                                            |    |
|----|---------------------------|----------------------|------------------------------------------------------------|----|
| 1  | Participant timeline      | <a href="#">#13</a>  | Time schedule of enrolment, interventions (including any   | 10 |
| 2  |                           |                      | run-ins and washouts), assessments, and visits for         |    |
| 3  |                           |                      | participants. A schematic diagram is highly recommended    |    |
| 4  |                           |                      | (see Figure)                                               |    |
| 5  |                           |                      |                                                            |    |
| 6  |                           |                      |                                                            |    |
| 7  |                           |                      |                                                            |    |
| 8  |                           |                      |                                                            |    |
| 9  |                           |                      |                                                            |    |
| 10 |                           |                      |                                                            |    |
| 11 | Sample size               | <a href="#">#14</a>  | Estimated number of participants needed to achieve         | 10 |
| 12 |                           |                      | study objectives and how it was determined, including      |    |
| 13 |                           |                      | clinical and statistical assumptions supporting any sample |    |
| 14 |                           |                      | size calculations                                          |    |
| 15 |                           |                      |                                                            |    |
| 16 |                           |                      |                                                            |    |
| 17 |                           |                      |                                                            |    |
| 18 |                           |                      |                                                            |    |
| 19 |                           |                      |                                                            |    |
| 20 |                           |                      |                                                            |    |
| 21 | Recruitment               | <a href="#">#15</a>  | Strategies for achieving adequate participant enrolment to | 10 |
| 22 |                           |                      | reach target sample size                                   |    |
| 23 |                           |                      |                                                            |    |
| 24 |                           |                      |                                                            |    |
| 25 |                           |                      |                                                            |    |
| 26 | <b>Methods:</b>           |                      |                                                            |    |
| 27 |                           |                      |                                                            |    |
| 28 | <b>Assignment of</b>      |                      |                                                            |    |
| 29 | <b>interventions (for</b> |                      |                                                            |    |
| 30 | <b>controlled trials)</b> |                      |                                                            |    |
| 31 |                           |                      |                                                            |    |
| 32 |                           |                      |                                                            |    |
| 33 |                           |                      |                                                            |    |
| 34 |                           |                      |                                                            |    |
| 35 |                           |                      |                                                            |    |
| 36 | Allocation: sequence      | <a href="#">#16a</a> | Method of generating the allocation sequence (eg,          | 7  |
| 37 | generation                |                      | computer-generated random numbers), and list of any        |    |
| 38 |                           |                      | factors for stratification. To reduce predictability of a  |    |
| 39 |                           |                      | random sequence, details of any planned restriction (eg,   |    |
| 40 |                           |                      | blocking) should be provided in a separate document that   |    |
| 41 |                           |                      | is unavailable to those who enrol participants or assign   |    |
| 42 |                           |                      | interventions                                              |    |
| 43 |                           |                      |                                                            |    |
| 44 |                           |                      |                                                            |    |
| 45 |                           |                      |                                                            |    |
| 46 |                           |                      |                                                            |    |
| 47 |                           |                      |                                                            |    |
| 48 |                           |                      |                                                            |    |
| 49 |                           |                      |                                                            |    |
| 50 |                           |                      |                                                            |    |
| 51 |                           |                      |                                                            |    |
| 52 |                           |                      |                                                            |    |
| 53 | Allocation                | <a href="#">#16b</a> | Mechanism of implementing the allocation sequence (eg,     | 7  |
| 54 | concealment               |                      | central telephone; sequentially numbered, opaque,          |    |
| 55 |                           |                      |                                                            |    |
| 56 |                           |                      |                                                            |    |
| 57 |                           |                      |                                                            |    |
| 58 | mechanism                 |                      |                                                            |    |
| 59 |                           |                      |                                                            |    |
| 60 |                           |                      |                                                            |    |

sealed envelopes), describing any steps to conceal the sequence until interventions are assigned

Allocation: [#16c](#) Who will generate the allocation sequence, who will enrol participants, and who will assign participants to interventions 7

Blinding (masking) [#17a](#) Who will be blinded after assignment to interventions (eg, trial participants, care providers, outcome assessors, data analysts), and how 7

Blinding (masking): [#17b](#) If blinded, circumstances under which unblinding is permissible, and procedure for revealing a participant's allocated intervention during the trial 7

**Methods: Data collection, management, and analysis**

Data collection plan [#18a](#) Plans for assessment and collection of outcome, baseline, and other trial data, including any related processes to promote data quality (eg, duplicate measurements, training of assessors) and a description of study instruments (eg, questionnaires, laboratory tests) along with their reliability and validity, if known. Reference to where data collection forms can be found, if not in the protocol 8

|    |                            |                      |                                                                |    |
|----|----------------------------|----------------------|----------------------------------------------------------------|----|
| 1  | Data collection plan:      | <a href="#">#18b</a> | Plans to promote participant retention and complete            | 8  |
| 2  |                            |                      |                                                                |    |
| 3  | retention                  |                      | follow-up, including list of any outcome data to be            |    |
| 4  |                            |                      | collected for participants who discontinue or deviate from     |    |
| 5  |                            |                      | intervention protocols                                         |    |
| 6  |                            |                      |                                                                |    |
| 7  |                            |                      |                                                                |    |
| 8  |                            |                      |                                                                |    |
| 9  |                            |                      |                                                                |    |
| 10 |                            |                      |                                                                |    |
| 11 | Data management            | <a href="#">#19</a>  | Plans for data entry, coding, security, and storage,           | 8  |
| 12 |                            |                      | including any related processes to promote data quality        |    |
| 13 |                            |                      | (eg, double data entry; range checks for data values).         |    |
| 14 |                            |                      | Reference to where details of data management                  |    |
| 15 |                            |                      | procedures can be found, if not in the protocol                |    |
| 16 |                            |                      |                                                                |    |
| 17 |                            |                      |                                                                |    |
| 18 | Statistics: outcomes       | <a href="#">#20a</a> | Statistical methods for analysing primary and secondary        | 11 |
| 19 |                            |                      | outcomes. Reference to where other details of the              |    |
| 20 |                            |                      | statistical analysis plan can be found, if not in the protocol |    |
| 21 |                            |                      |                                                                |    |
| 22 |                            |                      |                                                                |    |
| 23 | Statistics: additional     | <a href="#">#20b</a> | Methods for any additional analyses (eg, subgroup and          | 11 |
| 24 | analyses                   |                      | adjusted analyses)                                             |    |
| 25 |                            |                      |                                                                |    |
| 26 |                            |                      |                                                                |    |
| 27 |                            |                      |                                                                |    |
| 28 | Statistics: analysis       | <a href="#">#20c</a> | Definition of analysis population relating to protocol non-    | 11 |
| 29 | population and             |                      | adherence (eg, as randomised analysis), and any                |    |
| 30 | missing data               |                      | statistical methods to handle missing data (eg, multiple       |    |
| 31 |                            |                      | imputation)                                                    |    |
| 32 |                            |                      |                                                                |    |
| 33 |                            |                      |                                                                |    |
| 34 |                            |                      |                                                                |    |
| 35 |                            |                      |                                                                |    |
| 36 | <b>Methods: Monitoring</b> |                      |                                                                |    |
| 37 |                            |                      |                                                                |    |
| 38 |                            |                      |                                                                |    |
| 39 | Data monitoring:           | <a href="#">#21a</a> | Composition of data monitoring committee (DMC);                | 11 |
| 40 | formal committee           |                      | summary of its role and reporting structure; statement of      |    |
| 41 |                            |                      | whether it is independent from the sponsor and                 |    |
| 42 |                            |                      | competing interests; and reference to where further            |    |
| 43 |                            |                      |                                                                |    |
| 44 |                            |                      |                                                                |    |
| 45 |                            |                      |                                                                |    |
| 46 |                            |                      |                                                                |    |
| 47 |                            |                      |                                                                |    |
| 48 |                            |                      |                                                                |    |
| 49 |                            |                      |                                                                |    |
| 50 |                            |                      |                                                                |    |
| 51 |                            |                      |                                                                |    |
| 52 |                            |                      |                                                                |    |
| 53 |                            |                      |                                                                |    |
| 54 |                            |                      |                                                                |    |
| 55 |                            |                      |                                                                |    |
| 56 |                            |                      |                                                                |    |
| 57 |                            |                      |                                                                |    |
| 58 |                            |                      |                                                                |    |
| 59 |                            |                      |                                                                |    |
| 60 |                            |                      |                                                                |    |

1 details about its charter can be found, if not in the  
 2 protocol. Alternatively, an explanation of why a DMC is  
 3 not needed  
 4  
 5  
 6  
 7

|    |                      |                      |                                                              |     |
|----|----------------------|----------------------|--------------------------------------------------------------|-----|
| 8  | Data monitoring:     | <a href="#">#21b</a> | Description of any interim analyses and stopping             | n/a |
| 9  | interim analysis     |                      | guidelines, including who will have access to these          |     |
| 10 |                      |                      | interim results and make the final decision to terminate     |     |
| 11 |                      |                      | the trial                                                    |     |
| 12 |                      |                      |                                                              |     |
| 13 |                      |                      |                                                              |     |
| 14 |                      |                      |                                                              |     |
| 15 |                      |                      |                                                              |     |
| 16 |                      |                      |                                                              |     |
| 17 |                      |                      |                                                              |     |
| 18 | Harms                | <a href="#">#22</a>  | Plans for collecting, assessing, reporting, and managing     | n/a |
| 19 |                      |                      | solicited and spontaneously reported adverse events and      |     |
| 20 |                      |                      | other unintended effects of trial interventions or trial     |     |
| 21 |                      |                      | conduct                                                      |     |
| 22 |                      |                      |                                                              |     |
| 23 |                      |                      |                                                              |     |
| 24 |                      |                      |                                                              |     |
| 25 |                      |                      |                                                              |     |
| 26 |                      |                      |                                                              |     |
| 27 |                      |                      |                                                              |     |
| 28 | Auditing             | <a href="#">#23</a>  | Frequency and procedures for auditing trial conduct, if      | n/a |
| 29 |                      |                      | any, and whether the process will be independent from        |     |
| 30 |                      |                      | investigators and the sponsor                                |     |
| 31 |                      |                      |                                                              |     |
| 32 |                      |                      |                                                              |     |
| 33 |                      |                      |                                                              |     |
| 34 |                      |                      |                                                              |     |
| 35 | <b>Ethics and</b>    |                      |                                                              |     |
| 36 | <b>dissemination</b> |                      |                                                              |     |
| 37 |                      |                      |                                                              |     |
| 38 |                      |                      |                                                              |     |
| 39 |                      |                      |                                                              |     |
| 40 |                      |                      |                                                              |     |
| 41 | Research ethics      | <a href="#">#24</a>  | Plans for seeking research ethics committee / institutional  | 8   |
| 42 | approval             |                      | review board (REC / IRB) approval                            |     |
| 43 |                      |                      |                                                              |     |
| 44 |                      |                      |                                                              |     |
| 45 |                      |                      |                                                              |     |
| 46 | Protocol             | <a href="#">#25</a>  | Plans for communicating important protocol modifications     | n/a |
| 47 | amendments           |                      | (eg, changes to eligibility criteria, outcomes, analyses) to |     |
| 48 |                      |                      | relevant parties (eg, investigators, REC / IRBs, trial       |     |
| 49 |                      |                      | participants, trial registries, journals, regulators)        |     |
| 50 |                      |                      |                                                              |     |
| 51 |                      |                      |                                                              |     |
| 52 |                      |                      |                                                              |     |
| 53 |                      |                      |                                                              |     |
| 54 |                      |                      |                                                              |     |
| 55 |                      |                      |                                                              |     |
| 56 |                      |                      |                                                              |     |
| 57 |                      |                      |                                                              |     |
| 58 |                      |                      |                                                              |     |
| 59 |                      |                      |                                                              |     |
| 60 |                      |                      |                                                              |     |



|    |                       |                      |                                                                |     |
|----|-----------------------|----------------------|----------------------------------------------------------------|-----|
| 1  | Consent or assent     | <a href="#">#26a</a> | Who will obtain informed consent or assent from potential      | n/a |
| 2  |                       |                      | trial participants or authorised surrogates, and how (see      |     |
| 3  |                       |                      | Item 32)                                                       |     |
| 4  |                       |                      |                                                                |     |
| 5  |                       |                      |                                                                |     |
| 6  |                       |                      |                                                                |     |
| 7  |                       |                      |                                                                |     |
| 8  |                       |                      |                                                                |     |
| 9  | Consent or assent:    | <a href="#">#26b</a> | Additional consent provisions for collection and use of        | n/a |
| 10 | ancillary studies     |                      | participant data and biological specimens in ancillary         |     |
| 11 |                       |                      | studies, if applicable                                         |     |
| 12 |                       |                      |                                                                |     |
| 13 |                       |                      |                                                                |     |
| 14 |                       |                      |                                                                |     |
| 15 |                       |                      |                                                                |     |
| 16 | Confidentiality       | <a href="#">#27</a>  | How personal information about potential and enrolled          | n/a |
| 17 |                       |                      | participants will be collected, shared, and maintained in      |     |
| 18 |                       |                      | order to protect confidentiality before, during, and after     |     |
| 19 |                       |                      | the trial                                                      |     |
| 20 |                       |                      |                                                                |     |
| 21 |                       |                      |                                                                |     |
| 22 |                       |                      |                                                                |     |
| 23 |                       |                      |                                                                |     |
| 24 |                       |                      |                                                                |     |
| 25 |                       |                      |                                                                |     |
| 26 | Declaration of        | <a href="#">#28</a>  | Financial and other competing interests for principal          | 20  |
| 27 | interests             |                      | investigators for the overall trial and each study site        |     |
| 28 |                       |                      |                                                                |     |
| 29 |                       |                      |                                                                |     |
| 30 |                       |                      |                                                                |     |
| 31 | Data access           | <a href="#">#29</a>  | Statement of who will have access to the final trial           | 21  |
| 32 |                       |                      | dataset, and disclosure of contractual agreements that         |     |
| 33 |                       |                      | limit such access for investigators                            |     |
| 34 |                       |                      |                                                                |     |
| 35 |                       |                      |                                                                |     |
| 36 |                       |                      |                                                                |     |
| 37 |                       |                      |                                                                |     |
| 38 |                       |                      |                                                                |     |
| 39 | Ancillary and post    | <a href="#">#30</a>  | Provisions, if any, for ancillary and post-trial care, and for | n/a |
| 40 | trial care            |                      | compensation to those who suffer harm from trial               |     |
| 41 |                       |                      | participation                                                  |     |
| 42 |                       |                      |                                                                |     |
| 43 |                       |                      |                                                                |     |
| 44 |                       |                      |                                                                |     |
| 45 |                       |                      |                                                                |     |
| 46 |                       |                      |                                                                |     |
| 47 | Dissemination policy: | <a href="#">#31a</a> | Plans for investigators and sponsor to communicate trial       | 20  |
| 48 | trial results         |                      | results to participants, healthcare professionals, the         |     |
| 49 |                       |                      | public, and other relevant groups (eg, via publication,        |     |
| 50 |                       |                      | reporting in results databases, or other data sharing          |     |
| 51 |                       |                      | arrangements), including any publication restrictions          |     |
| 52 |                       |                      |                                                                |     |
| 53 |                       |                      |                                                                |     |
| 54 |                       |                      |                                                                |     |
| 55 |                       |                      |                                                                |     |
| 56 |                       |                      |                                                                |     |
| 57 |                       |                      |                                                                |     |
| 58 |                       |                      |                                                                |     |
| 59 |                       |                      |                                                                |     |
| 60 |                       |                      |                                                                |     |

1 Dissemination policy: [#31b](#) Authorship eligibility guidelines and any intended use of n/a  
 2  
 3 authorship professional writers  
 4  
 5

6 Dissemination policy: [#31c](#) Plans, if any, for granting public access to the full 20  
 7  
 8 reproducible protocol, participant-level dataset, and statistical code  
 9  
 10 research  
 11  
 12

## 13 Appendices

14  
 15  
 16  
 17 Informed consent [#32](#) Model consent form and other related documentation n/a  
 18  
 19 materials given to participants and authorised surrogates  
 20  
 21

22  
 23 Biological specimens [#33](#) Plans for collection, laboratory evaluation, and storage of n/a  
 24  
 25 biological specimens for genetic or molecular analysis in  
 26  
 27 the current trial and for future use in ancillary studies, if  
 28  
 29 applicable  
 30  
 31

32  
 33 The SPIRIT Explanation and Elaboration paper is distributed under the terms of the Creative  
 34  
 35 Commons Attribution License CC-BY-NC. This checklist was completed on 26. July 2021 using  
 36  
 37 <https://www.goodreports.org/>, a tool made by the [EQUATOR Network](#) in collaboration with  
 38  
 39 [Penelope.ai](#)  
 40  
 41  
 42  
 43  
 44  
 45  
 46  
 47  
 48  
 49  
 50  
 51  
 52  
 53  
 54  
 55  
 56  
 57  
 58  
 59  
 60
